# Supplementary material
Source: ML conference proceedings conference paper supplement (https://openreview.net/forum?id=l6pYRbuHpO)
Supplement: supplementary_material [file attachment]

---

# Practical Contextual Bandits with Feedback Graphs

---

Anonymous Author(s)

Affiliation

Address

email

## Abstract

While contextual bandit has a mature theory, effectively leveraging different feedback patterns to enhance the pace of learning remains unclear. Bandits with feedback graphs, which interpolates between the full information and bandit regimes, provides a promising framework to mitigate the statistical complexity of learning. In this paper, we propose and analyze an approach to contextual bandits with feedback graphs based upon reduction to regression. The resulting algorithms are computationally practical and achieve established minimax rates, thereby reducing the statistical complexity in real-world applications.

## 1 Introduction

This paper is primarily concerned with increasing the pace of learning for contextual bandits [Auer et al., 2002, Langford and Zhang, 2007]. While contextual bandits have enjoyed broad applicability [Bouneffouf et al., 2020], the statistical complexity of learning with bandit feedback imposes a data lower bound for application scenarios [Agarwal et al., 2012]. This has inspired various mitigation strategies, including exploiting function class structure for improved experimental design [Zhu and Mineiro, 2022], and composing with memory for learning with fewer samples [Rucker et al., 2022]. In this paper we exploit alternative graph feedback patterns to accelerate learning: intuitively, there is no need to explore a potentially suboptimal action if a presumed better action, when exploited, yields the necessary information.

The framework of bandits with feedback graphs is mature and provides a solid theoretical foundation for incorporating additional feedback into an exploration strategy [Mannor and Shamir, 2011, Alon et al., 2015, 2017]. Succinctly, in this framework, the observation of the learner is decided by a directed feedback graph  $G$ : when an action is played, the learner observes the loss of every action to which the chosen action is connected. When the graph only contains self-loops, this problem reduces to the classic bandit case. For non-contextual bandits with feedback graphs, [Alon et al., 2015] provides a full characterization on the minimax regret bound with respect to different graph theoretic quantities associated with  $G$  according to the type of the feedback graph.

However, contextual bandits with feedback graphs have received less attention [Singh et al., 2020, Wang et al., 2021]. Specifically, there is no prior work offering a solution for general feedback graphs and function classes. In this work, we take an important step in this direction by adopting recently developed minimax algorithm design principles in contextual bandits, which leverage realizability and reduction to regression to construct practical algorithms with strong statistical guarantees [Foster et al., 2018, Foster and Rakhlin, 2020, Foster et al., 2020, Foster and Krishnamurthy, 2021, Foster et al., 2021, Zhu and Mineiro, 2022]. Using this strategy, we construct a practical algorithm for contextual bandits with feedback graphs that achieves the optimal regret bound. Moreover, although our primary concern is accelerating learning when the available feedback is more informative than bandit feedback, our techniques also succeed when the available feedback is less informative than bandit feedback, e.g., in spam filtering where some actions generate no feedback. More specifically, our contributions are as follows.

**Contributions.** In this paper, we extend the minimax framework proposed in [Foster et al., 2021] to contextual bandits with general feedback graphs, aiming to promote the utilization of different feedback patterns in practical applications. Following [Foster and Rakhlin, 2020, Foster et al., 2021, Zhu and Mineiro, 2022], we assume that there is an online regression oracle for supervised learning on the loss. Based on this oracle, we propose SquareCB.G, the first algorithm for contextual bandits with feedback graphs that operates via reduction to regression (Algorithm 1). Eliding regression regret factors, our algorithm achieves the matching optimal regret bounds for deterministic feedback graphs, with  $\tilde{O}(\sqrt{\alpha T})$  regret for strongly observable graphs and  $\tilde{O}(d^{\frac{1}{3}} T^{\frac{2}{3}})$  regret for weakly observable graphs, where  $\alpha$  and  $d$  are respectively the independence number and weakly domination number of the feedback graph (see Section 3.2 for definitions). Notably, SquareCB.G is computationally tractable, requiring the solution to a convex program (Theorem 3.6), which can be readily solved with off-the-shelf convex solvers (Appendix A.3). In addition, we provide closed-form solutions for specific cases of interest (Section 4), leading to a more efficient implementation of our algorithm. Empirical results further showcase the effectiveness of our approach (Section 5).

## 2 Problem Setting and Preliminary

Throughout this paper, we let  $[n]$  denote the set  $\{1, 2, \dots, n\}$  for any positive integer  $n$ . We consider the following contextual bandits problem with informed feedback graphs. The learning process goes in  $T$  rounds. At each round  $t \in [T]$ , an environment selects a context  $x_t \in \mathcal{X}$ , a (stochastic) directed feedback graph  $G_t \in [0, 1]^{\mathcal{A} \times \mathcal{A}}$ , and a loss distribution  $\mathbb{P}_t : \mathcal{X} \rightarrow \Delta([-1, 1]^{\mathcal{A}})$ ; where  $\mathcal{A}$  is the action set with finite cardinality  $K$ . For convenience, we use  $\mathcal{A}$  and  $[K]$  interchangeably for denoting the action set. Both  $G_t$  and  $x_t$  are revealed to the learner at the beginning of each round  $t$ . Then the learner selects one of the actions  $a_t \in \mathcal{A}$ , while at the same time, the environment samples a loss vector  $\ell_t \in [-1, 1]^{\mathcal{A}}$  from  $\mathbb{P}_t(\cdot | x_t)$ . The learner then observes some information about  $\ell_t$  according to the feedback graph  $G_t$ . Specifically, for each action  $j$ , she observes the loss of action  $j$  with probability  $G_t(a_t, j)$ , resulting in a realization  $A_t$ , which is the set of actions whose loss is observed. With a slight abuse of notation, denote  $G_t(\cdot | a)$  as the distribution of  $A_t$  when action  $a$  is picked. We allow the context  $x_t$ , the (stochastic) feedback graphs  $G_t$  and the loss distribution  $\mathbb{P}_t(\cdot | x_t)$  to be selected by an adaptive adversary. When convenient, we will consider  $G$  to be a  $K$ -by- $K$  matrix and utilize matrix notation.

**Other Notations.** Let  $\Delta(K)$  denote the set of all Radon probability measures over a set  $[K]$ .  $\text{conv}(S)$  represents the convex hull of a set  $S$ . Denote  $I$  as the identity matrix with an appropriate dimension. For a  $K$ -dimensional vector  $v$ ,  $\text{diag}(v)$  denotes the  $K$ -by- $K$  matrix with the  $i$ -th diagonal entry  $v_i$  and other entries 0. We use  $\mathbb{R}_{\geq 0}^K$  to denote the set of  $K$ -dimensional vectors with non-negative entries. For a positive definite matrix  $M \in \mathbb{R}^{K \times K}$ , we define norm  $\|z\|_M = \sqrt{z^\top M z}$  for any vector  $z \in \mathbb{R}^K$ . We use the  $\tilde{O}(\cdot)$  notation to hide factors that are polylogarithmic in  $K$  and  $T$ .

**Realizability.** We assume that the learner has access to a known function class  $\mathcal{F} \subset (\mathcal{X} \times \mathcal{A} \mapsto [-1, 1])$  which characterizes the mean of the loss for a given context-action pair, and we make the following standard realizability assumption studied in the contextual bandit literature [Agarwal et al., 2012, Foster et al., 2018, Foster and Rakhlin, 2020, Simchi-Levi and Xu, 2021].

**Assumption 1 (Realizability).** *There exists a regression function  $f^* \in \mathcal{F}$  such that  $\mathbb{E}[\ell_{t,a} | x_t] = f^*(x_t, a)$  for any  $a \in \mathcal{A}$  and across all  $t \in [T]$ .*

Two comments are in order. First, we remark that, similar to [Foster et al., 2020], misspecification can be incorporated while maintaining computational efficiency, but we do not complicate the exposition here. Second, Assumption 1 induces a “semi-adversarial” setting, wherein nature is completely free to determine the context and graph sequences; and has considerable latitude in determining the loss distribution subject to a mean constraint.

**Regret.** For each regression function  $f \in \mathcal{F}$ , let  $\pi_f(x_t) := \arg\min_{a \in \mathcal{A}} f(x_t, a)$  denote the induced policy, which chooses the action with the least loss with respect to  $f$ . Define  $\pi^* := \pi_{f^*}$  as the optimal policy. We measure the performance of the learner via regret to  $\pi^*$ :  $\text{Reg}_{\text{CB}} := \sum_{t=1}^T \ell_{t,a_t} - \sum_{t=1}^T \ell_{t,\pi^*(x_t)}$ , which is the difference between the loss suffered by the learner and the one if the learner applies policy  $\pi^*$ .

**Regression Oracle** We assume access to an online regression oracle  $\text{Alg}_{\text{Sq}}$  for function class  $\mathcal{F}$ , which is an algorithm for online learning with squared loss. We consider the following protocol. At each round  $t \in [T]$ , the algorithm produces an estimator  $\hat{f}_t \in \text{conv}(\mathcal{F})$ , then receives a set of context-action-loss tuples  $\{(x_t, a, \ell_{t,a})\}_{a \in A_t}$  where  $A_t \subseteq \mathcal{A}$ . The goal of the oracle is to accurately predict the loss as a function of the context and action, and we evaluate its performance via the square loss  $\sum_{a \in A_t} (\hat{f}_t(x_t, a) - \ell_{t,a})^2$ . We measure the oracle's cumulative performance via the following square-loss regret to the best function in  $\mathcal{F}$ .

**Assumption 2** (Bounded square-loss regret). *The regression oracle  $\text{Alg}_{\text{Sq}}$  guarantees that for any (potentially adaptively chosen) sequence  $\{(x_t, a, \ell_{t,a})\}_{a \in A_t, t \in [T]}$  in which  $A_t \subseteq \mathcal{A}$ ,*

$$\sum_{t=1}^T \sum_{a \in A_t} \left( \hat{f}_t(x_t, a) - \ell_{t,a} \right)^2 - \inf_{f \in \mathcal{F}} \sum_{t=1}^T \sum_{a \in A_t} (f(x_t, a) - \ell_{t,a})^2 \leq \text{Reg}_{\text{Sq}}.$$

For finite  $\mathcal{F}$ , Vovk's aggregation algorithm yields  $\text{Reg}_{\text{Sq}} = \mathcal{O}(\log|\mathcal{F}|)$  [Vovk, 1995]. This regret is dependent upon the scale of the loss function, but this need not be linear with the size of  $A_t$ , e.g., the loss scale can be bounded by 2 in classification problems. See Foster and Krishnamurthy [2021] for additional examples of online regression algorithms.

### 3 Algorithms and Regret Bounds

In this section, we provide our main algorithms and results.

#### 3.1 Algorithms via Minimax Reduction Design

Our approach is to adapt the minimax formulation of [Foster et al., 2021] to contextual bandits with feedback graphs. In the standard contextual bandits setting (that is,  $G_t = I$  for all  $t$ ), Foster et al. [2021] define the *Decision-Estimation Coefficient* (DEC) for a parameter  $\gamma > 0$  as  $\text{dec}_\gamma(\mathcal{F}) := \sup_{\hat{f} \in \text{conv}(\mathcal{F}), x \in \mathcal{X}} \text{dec}_\gamma(\mathcal{F}; \hat{f}, x)$ , where

$$\begin{aligned} \text{dec}_\gamma(\mathcal{F}; \hat{f}, x) &:= \inf_{p \in \Delta(K)} \text{dec}_\gamma(p, \mathcal{F}; \hat{f}, x) \\ &:= \inf_{p \in \Delta(K)} \sup_{\substack{a^* \in [K] \\ f^* \in \mathcal{F}}} \mathbb{E}_{a \sim p} \left[ f^*(x, a) - f^*(x, a^*) - \frac{\gamma}{4} \cdot \left( \hat{f}(x, a) - f^*(x, a) \right)^2 \right]. \end{aligned} \quad (1)$$

Their proposed algorithm is as follows. At each round  $t$ , after receiving the context  $x_t$ , the algorithm first computes  $\hat{f}_t$  by calling the regression oracle. Then, it solves the solution  $p_t$  of the minimax problem defined in Eq. (1) with  $\hat{f}$  and  $x$  replaced by  $\hat{f}_t$  and  $x_t$ . Finally, the algorithm samples an action  $a_t$  from the distribution  $p_t$  and feeds the observation  $(x_t, a_t, \ell_{t,a_t})$  to the oracle. Foster et al. [2021] show that for any value  $\gamma$ , the algorithm above guarantees that

$$\mathbb{E}[\text{Reg}_{\text{CB}}] \leq T \cdot \text{dec}_\gamma(\mathcal{F}) + \frac{\gamma}{4} \cdot \text{Reg}_{\text{Sq}}. \quad (2)$$

However, the minimax problem Eq. (1) may not be solved efficiently in many cases. Therefore, instead of obtaining the distribution  $p_t$  which has the exact minimax value of Eq. (1), Foster et al. [2021] show that any distribution that gives an upper bound  $C_\gamma$  on  $\text{dec}_\gamma(p, \mathcal{F}; \hat{f}, x)$  also works and enjoys a regret bound with  $\text{dec}_\gamma(\mathcal{F})$  replaced by  $C_\gamma$  in Eq. (2).

To extend this framework to the setting with feedback graph  $G$ , we define  $\text{dec}_\gamma(\mathcal{F}; \hat{f}, x, G)$  as follows

$$\begin{aligned} \text{dec}_\gamma(\mathcal{F}; \hat{f}, x, G) &:= \inf_{p \in \Delta(K)} \text{dec}_\gamma(p, \mathcal{F}; \hat{f}, x, G) \\ &:= \inf_{p \in \Delta(K)} \sup_{\substack{a^* \in [K] \\ f^* \in \mathcal{F}}} \mathbb{E}_{a \sim p} \left[ f^*(x, a) - f^*(x, a^*) - \frac{\gamma}{4} \mathbb{E}_{A \sim G(\cdot|a)} \left[ \sum_{a' \in A} (\hat{f}_t(x, a') - f^*(x, a'))^2 \right] \right]. \end{aligned} \quad (3)$$

---

**Algorithm 1** SquareCB.G. Note [Theorem 3.6](#) provides an efficient implementation of [Eq. \(4\)](#).

---

Input: parameter  $\gamma \geq 4$ , a regression oracle  $\text{Alg}_{\text{Sq}}$

**for**  $t = 1, 2, \dots, T$  **do**

    Receive context  $x_t$  and directed feedback graph  $G_t$ .

    Obtain an estimator  $\hat{f}_t$  from the oracle  $\text{Alg}_{\text{Sq}}$ .

    Compute the distribution  $p_t \in \Delta(K)$  such that  $p_t = \operatorname{argmin}_{p \in \Delta(K)} \overline{\text{dec}}_\gamma(p; \hat{f}_t, x_t, G_t)$ , where

$$\overline{\text{dec}}_\gamma(p; \hat{f}_t, x_t, G_t) := \sup_{\substack{a^* \in [K] \\ f^* \in \Phi}} \mathbb{E}_{a \sim p} \left[ f^*(x_t, a) - f^*(x_t, a^*) - \frac{\gamma}{4} \mathbb{E}_{A \sim G_t(\cdot|a)} \left[ \sum_{a' \in A} (\hat{f}_t(x_t, a') - f^*(x_t, a'))^2 \right] \right], \quad (4)$$

    and  $\Phi := \mathcal{X} \times [K] \mapsto \mathbb{R}$ .

    Sample  $a_t$  from  $p_t$  and observe  $\{\ell_{t,j}\}_{j \in A_t}$  where  $A_t \sim G_t(\cdot|a_t)$ .

    Feed the tuples  $\{(x_t, j, \ell_{t,j})\}_{j \in A_t}$  to the oracle  $\text{Alg}_{\text{Sq}}$ .

**end**

---

120 Compared with [Eq. \(1\)](#), the difference is that we replace the squared estimation error on action  $a$  by  
121 the expected one on the observed set  $A \sim G(\cdot|a)$ , which intuitively utilizes more feedbacks from  
122 the graph structure. When the feedback graph is the identity matrix, we recover [Eq. \(1\)](#). Based on  
123  $\text{dec}_\gamma(\mathcal{F}; \hat{f}, x, G)$ , our algorithm SquareCB.G is shown in [Algorithm 1](#). As what is done in [[Foster](#)  
124 [et al., 2021](#)], in order to derive an efficient algorithm, instead of solving the distribution  $p_t$  with  
125 respect to the supremum over  $f^* \in \mathcal{F}$ , we solve  $p_t$  that minimize  $\overline{\text{dec}}_\gamma(p; \hat{f}, x_t, G_t)$  ([Eq. \(4\)](#)), which  
126 takes supremum over  $f^* \in (\mathcal{X} \times [K] \mapsto \mathbb{R})$ , leading to an upper bound on  $\text{dec}_\gamma(\mathcal{F}; \hat{f}, x_t, G_t)$ . Then,  
127 we receive the loss  $\{\ell_{t,j}\}_{j \in A_t}$  and feed the tuples  $\{(x_t, j, \ell_{t,j})\}_{j \in A_t}$  to the regression oracle  $\text{Alg}_{\text{Sq}}$ .  
128 Following a similar analysis to [[Foster et al., 2021](#)], we show that to bound the regret  $\text{Reg}_{\text{CB}}$ , we  
129 only need to bound  $\overline{\text{dec}}_\gamma(p_t; \hat{f}_t, x_t, G_t)$ .

130 **Theorem 3.1.** Suppose  $\overline{\text{dec}}_\gamma(p_t; \hat{f}_t, x_t, G_t) \leq C\gamma^{-\beta}$  for all  $t \in [T]$  and some  $\beta > 0$ , [Algorithm 1](#)  
131 with  $\gamma = \max\{4, (CT)^{\frac{1}{\beta+1}} \text{Reg}_{\text{Sq}}^{-\frac{1}{\beta+1}}\}$  guarantees that  $\mathbb{E}[\text{Reg}_{\text{CB}}] \leq \mathcal{O}\left(C^{\frac{1}{\beta+1}} T^{\frac{1}{\beta+1}} \text{Reg}_{\text{Sq}}^{\frac{\beta}{\beta+1}}\right)$ .

132 The proof is deferred to [Appendix A](#). In [Section 3.3](#), we give an efficient implementation for solving  
133 [Eq. \(4\)](#) via reduction to convex programming.

### 134 3.2 Regret Bounds

135 In this section, we derive regret bounds for [Algorithm 1](#) when  $G_t$ 's are specialized to deterministic  
136 graphs, i.e.,  $G_t \in \{0, 1\}^{A \times A}$ . We utilize discrete graph notation  $G = ([K], E)$ , where  $E \subseteq$   
137  $[K] \times [K]$ ; and define  $N^{\text{in}}(G, j) \triangleq \{i \in A : (i, j) \in E\}$  as the set of nodes that can observe node  
138  $j$ . In this case, at each round  $t$ , the observed node set  $A_t$  is a deterministic set which contains any  
139 node  $i$  satisfying  $a_t \in N^{\text{in}}(G_t, i)$ . In the following, we introduce several graph-theoretic concepts  
140 for deterministic feedback graphs [[Alon et al., 2015](#)].

141 **Strongly/Weakly Observable Graphs.** For a directed graph  $G = ([K], E)$ , a node  $i$  is observable  
142 if  $N^{\text{in}}(G, i) \neq \emptyset$ . An observable node is strongly observable if either  $i \in N^{\text{in}}(G, i)$  or  $N^{\text{in}}(G, i) =$   
143  $[K] \setminus \{i\}$ , and weakly observable otherwise. Similarly, a graph is observable if all its nodes are  
144 observable. An observable graph is strongly observable if all nodes are strongly observable, and  
145 weakly observable otherwise. Self-aware graphs are a special type of strongly observable graphs  
146 where  $i \in N^{\text{in}}(G, i)$  for all  $i \in [K]$ .

147 **Independent Set and Weakly Dominating Set.** An independence set of a directed graph is a subset  
148 of nodes in which no two distinct nodes are connected. The size of the largest independence set of a  
149 graph is called its independence number. For a weakly observable graph  $G = ([K], E)$ , a weakly  
150 dominating set is a subset of nodes  $D \subseteq [K]$  such that for any node  $j$  in  $G$  without a self-loop, there  
151 exists  $i \in D$  such that directed edge  $(i, j) \in E$ . The size of the smallest weakly dominating set of a

graph is called its weak domination number. Alon et al. [2015] show that in non-contextual bandits with a fixed feedback graph  $G$ , the minimax regret bound is  $\tilde{\Theta}(\sqrt{\alpha T})$  when  $G$  is strongly observable and  $\tilde{\Theta}(d^{\frac{1}{3}} T^{\frac{2}{3}})$  when  $G$  is weakly observable, where  $\alpha$  and  $d$  are the independence number and the weak domination number of  $G$ , respectively.

### 3.2.1 Strongly Observable Graphs

In the following theorem, we show the regret bound of Algorithm 1 for strongly observable graphs.

**Theorem 3.2** (Strongly observable graphs). *Suppose that the feedback graph  $G_t$  is deterministic and strongly observable with independence number no more than  $\alpha$ . Then Algorithm 1 guarantees that  $\overline{\text{dec}}_\gamma(p_t; \hat{f}_t, x_t, G_t) \leq \mathcal{O}\left(\frac{\alpha \log(K\gamma)}{\gamma}\right)$ .*

In contrast to existing works that derive a closed-form solution of  $p_t$  in order to show how large the DEC can be [Foster and Rakhlin, 2020, Foster and Krishnamurthy, 2021], in our case we prove the upper bound of  $\overline{\text{dec}}_\gamma(p_t; \hat{f}_t, x_t, G_t)$  by using the Sion’s minimax theorem and the graph-theoretic lemma proven in [Alon et al., 2015]. The proof is deferred to Appendix A.1. Combining Theorem 3.2 and Theorem 3.1, we directly have the following corollary:

**Corollary 3.3.** *Suppose that  $G_t$  is deterministic, strongly observable, and has independence number no more than  $\alpha$  for all  $t \in [T]$ . Algorithm 1 with choice  $\gamma = \max\left\{4, \sqrt{\alpha T / \text{Reg}_{\text{Sq}}}\right\}$  guarantees that  $\mathbb{E}[\text{Reg}_{\text{CB}}] \leq \tilde{\mathcal{O}}(\sqrt{\alpha T \text{Reg}_{\text{Sq}}})$ .*

### 3.2.2 Weakly Observable Graphs

For the weakly observable graph, we have the following theorem.

**Theorem 3.4** (Weakly observable graphs). *Suppose that the feedback graph  $G_t$  is deterministic and weakly observable with weak domination number no more than  $d$ . Then Algorithm 1 with  $\gamma \geq 16d$  guarantees that  $\overline{\text{dec}}_\gamma(p_t; \hat{f}_t, x_t, G_t) \leq \mathcal{O}\left(\sqrt{\frac{d}{\gamma}} + \frac{\tilde{\alpha} \log(K\gamma)}{\gamma}\right)$ , where  $\tilde{\alpha}$  is the independence number of the subgraph induced by nodes with self-loops in  $G_t$ .*

The proof is deferred to Appendix A.2. Similar to Theorem 3.2, we do not derive a closed-form solution to the strategy  $p_t$  but prove this upper bound using the minimax theorem. Combining Theorem 3.4 and Theorem 3.1, we are able to obtain the following regret bound for weakly observable graphs, whose proof is deferred to Appendix A.2.

**Corollary 3.5.** *Suppose that  $G_t$  is deterministic, weakly observable, and has weak domination number no more than  $d$  for all  $t \in [T]$ . In addition, suppose that the independence number of the subgraph induced by nodes with self-loops in  $G_t$  is no more than  $\tilde{\alpha}$  for all  $t \in [T]$ . Then, Algorithm 1 with  $\gamma = \max\{16d, \sqrt{\tilde{\alpha} T / \text{Reg}_{\text{Sq}}}, d^{\frac{1}{3}} T^{\frac{2}{3}} \text{Reg}_{\text{Sq}}^{-\frac{2}{3}}\}$  guarantees that  $\mathbb{E}[\text{Reg}_{\text{CB}}] \leq \tilde{\mathcal{O}}(d^{\frac{1}{3}} T^{\frac{2}{3}} \text{Reg}_{\text{Sq}}^{\frac{1}{3}} + \sqrt{\tilde{\alpha} T \text{Reg}_{\text{Sq}}})$ .*

## 3.3 Implementation

In this section, we show that solving  $\arg\min_{p \in \Delta(K)} \overline{\text{dec}}_\gamma(p; \hat{f}, x, G)$  in Algorithm 1 is equivalent to solving a convex program, which can be easily and efficiently implemented in practice.

**Theorem 3.6.** *Solving  $\arg\min_{p \in \Delta(K)} \overline{\text{dec}}_\gamma(p; \hat{f}, x, G)$  is equivalent to solving the following convex optimization problem.*

$$\begin{aligned} \min_{p \in \Delta(K), z} \quad & p^\top \hat{f} + z \\ \text{subject to} \quad & \forall a \in [K] : \frac{1}{\gamma} \|p - e_a\|_{\text{diag}(G^\top p)^{-1}}^2 \leq \hat{f}(x, a) + z, \\ & G^\top p \succ 0, \end{aligned} \tag{5}$$

where  $\hat{f}$  in the objective is a shorthand for  $\hat{f}(x, \cdot) \in \mathbb{R}^K$ ,  $e_a$  is the  $a$ -th standard basis vector, and  $\succ$  means element-wise greater.

191 The proof is deferred to [Appendix A.4](#). Note that this implementation is not restricted to the deter-  
 192 ministic feedback graphs but applies to the general stochastic feedback graph case. In [Appendix A.3](#),  
 193 we provide the 20 lines of Python code that solves [Eq. \(5\)](#).

## 194 4 Examples with Closed-Form Solutions

195 In this section, we present examples and corresponding closed-form solutions of  $p$  that make the  
 196 value  $\overline{\text{dec}}_\gamma(p; \hat{f}, x, G)$  upper bounded by at most a constant factor of  $\min_p \overline{\text{dec}}_\gamma(p; \hat{f}, x, G)$ . This  
 197 offers an alternative to solving the convex program defined in [Theorem 3.6](#) for special (and practically  
 198 relevant) cases, thereby enhancing the efficiency of our algorithm. All the proofs are deferred to  
 199 [Appendix B](#).

200 **Cops-and-Robbers Graph.** The “cops-and-robbers” feedback graph  $G_{\text{CR}} = 11^\top - I$ , also known  
 201 as the loopless clique, is the full feedback graph removing self-loops. Therefore,  $G_{\text{CR}}$  is strongly  
 202 observable with independence number  $\alpha = 1$ . Let  $a_1$  be the node with the smallest value of  $\hat{f}$  and  
 203  $a_2$  be the node with the second smallest value of  $\hat{f}$ . Our proposed closed-form distribution  $p$  is only  
 204 supported on  $\{a_1, a_2\}$  and defined as follows:

$$p_{a_1} = 1 - \frac{1}{2 + \gamma(\hat{f}_{a_2} - \hat{f}_{a_1})}, \quad p_{a_2} = \frac{1}{2 + \gamma(\hat{f}_{a_2} - \hat{f}_{a_1})}. \quad (6)$$

205 In the following proposition, we show that with the construction of  $p$  in [Eq. \(6\)](#),  $\overline{\text{dec}}_\gamma(p; \hat{f}, x, G_{\text{CR}})$  is  
 206 upper bounded by  $\mathcal{O}(1/\gamma)$ , which matches the order of  $\min_p \overline{\text{dec}}_\gamma(p; \hat{f}, x, G)$  based on [Theorem 3.2](#)  
 207 since  $\alpha = 1$ .

208 **Proposition 1.** *When  $G = G_{\text{CR}}$ , given any  $\hat{f}$ , context  $x$ , the closed-form distribution  $p$  in [Eq. \(6\)](#)  
 209 guarantees that  $\overline{\text{dec}}_\gamma(p; \hat{f}, x, G_{\text{CR}}) \leq \mathcal{O}\left(\frac{1}{\gamma}\right)$ .*

210 **Apple Tasting Graph.** The apple tasting feedback graph  $G_{\text{AT}} = \begin{bmatrix} 1 & 1 \\ 0 & 0 \end{bmatrix}$  consists of two nodes,  
 211 where the first node reveals all and the second node reveals nothing. This scenario was originally  
 212 proposed by [Helmholtz et al. \[2000\]](#) and recently denoted the spam filtering graph [[van der Hoeven](#)  
 213 [et al., 2021](#)]. The independence number of  $G_{\text{AT}}$  is 1. Let  $\hat{f}_1$  be the oracle prediction for the first node  
 214 and let  $\hat{f}_2$  be the prediction for the second node. We present a closed-form solution  $p$  for [Eq. \(4\)](#) as  
 215 follows:

$$p_1 = \begin{cases} 1 & \hat{f}_1 \leq \hat{f}_2 \\ \frac{2}{4 + \gamma(\hat{f}_1 - \hat{f}_2)} & \hat{f}_1 > \hat{f}_2 \end{cases}, \quad p_2 = 1 - p_1. \quad (7)$$

216 We show that this distribution  $p$  satisfies that  $\overline{\text{dec}}_\gamma(p; \hat{f}, x, G_{\text{AT}})$  is upper bounded by  $\mathcal{O}(1/\gamma)$  in the  
 217 following proposition. We remark that directly applying results from [[Foster et al., 2021](#)] cannot lead  
 218 to a valid upper bound since the second node does not have a self-loop.

219 **Proposition 2.** *When  $G = G_{\text{AT}}$ , given any  $\hat{f}$ , context  $x$ , the closed-form distribution  $p$  in [Eq. \(7\)](#)  
 220 guarantees that  $\overline{\text{dec}}_\gamma(p; \hat{f}, x, G_{\text{AT}}) \leq \mathcal{O}\left(\frac{1}{\gamma}\right)$ .*

221 **Inventory Graph.** In this application, the algorithm needs to decide the inventory level in order  
 222 to fulfill the realized demand arriving at each round. Specifically, there are  $K$  possible chosen  
 223 inventory levels  $a_1 < a_2 < \dots < a_K$  and the feedback graph  $G_{\text{inv}}$  has entries  $G(i, j) = 1$  for all  
 224  $1 \leq j \leq i \leq K$  and  $G(i, j) = 0$  otherwise, meaning that picking the inventory level  $a_i$  informs  
 225 about all actions  $a_{j \leq i}$ . This is because items are consumed until either the demand or the inventory is  
 226 exhausted. The independence number of  $G_{\text{inv}}$  is 1. Therefore, (very) large  $K$  is statistically tractable,  
 227 but naively solving the convex program [Eq. \(5\)](#) requires superlinear in  $K$  computational cost. We  
 228 show in the following proposition that there exists an analytic form of  $p$ , which guarantees that  
 229  $\overline{\text{dec}}_\gamma(p; \hat{f}, x, G_{\text{inv}})$  can be bounded by  $\mathcal{O}(1/\gamma)$ .

230 **Proposition 3.** *When  $G = G_{\text{inv}}$ , given any  $\hat{f}$ , context  $x$ , there exists a closed-form distribution  
 231  $p \in \Delta(K)$  guaranteeing that  $\overline{\text{dec}}_\gamma(p; \hat{f}, x, G_{\text{inv}}) \leq \mathcal{O}\left(\frac{1}{\gamma}\right)$ , where  $p$  is defined as follows:  $p_j =$   
 232  $\max\left\{\frac{1}{1 + \gamma(\hat{f}_j - \min_i \hat{f}_i)} - \sum_{j' > j} p_{j'}, 0\right\}$  for all  $j \in [K]$ .*

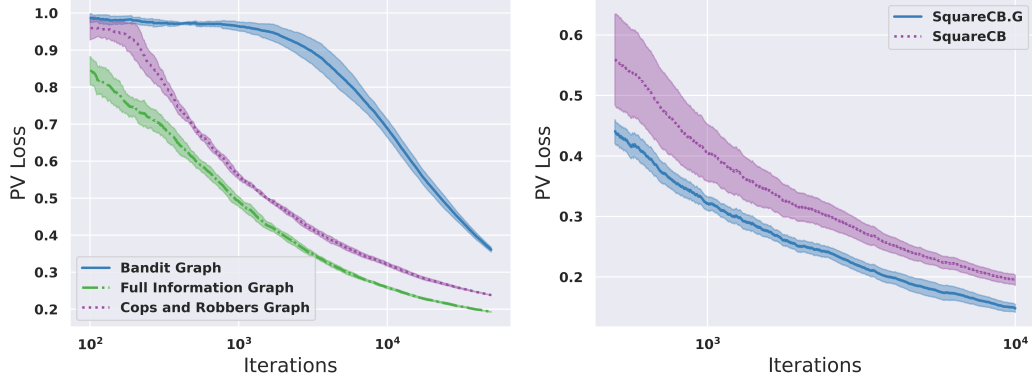

Figure 1: **Left figure:** Performance of SquareCB.G on RCV1 dataset under three different feedback graphs. **Right figure:** Performance comparison between SquareCB.G and SquareCB under random directed self-aware feedback graphs.

**Undirected Self-Aware Graph.** For the undirected and self-aware feedback graph  $G$ , which means that  $G$  is symmetric and has diagonal entries all 1, we also show that a certain closed-form solution of  $p$  satisfies that  $\overline{\text{dec}}_\gamma(p; \hat{f}, x, G)$  is bounded by  $\mathcal{O}(\frac{\alpha}{\gamma})$ .

**Proposition 4.** When  $G$  is an undirected self-aware graph, given any  $\hat{f}$ , context  $x$ , there exists a closed-form distribution  $p \in \Delta(K)$  guaranteeing that  $\overline{\text{dec}}_\gamma(p; \hat{f}, x, G) \leq \mathcal{O}(\frac{\alpha}{\gamma})$ .

## 5 Experiments

In this section, we use empirical results to demonstrate the significant benefits of SquareCB.G in leveraging the graph feedback structure and its superior effectiveness compared to SquareCB. Following Foster and Krishnamurthy [2021], we use progressive validation (PV) loss as the evaluation metric, defined as  $L_{\text{pv}}(T) = \frac{1}{T} \sum_{t=1}^T \ell_{t, a_t}$ . All the feedback graphs used in the experiments are deterministic. We run experiments on CPU Intel Xeon Gold 6240R 2.4G and the convex program solver is implemented via Vowpal Wabbit [Langford et al., 2007].

### 5.1 SquareCB.G under Different Feedback Graphs

In this subsection, we show that our SquareCB.G benefits from considering the graph structure by evaluating the performance of SquareCB.G under three different feedback graphs. We conduct experiments on RCV1 dataset and leave the implementation details in Appendix C.1.

The performances of SquareCB.G under bandit graph, full information graph and cops-and-robbers graph are shown in the left part of Figure 1. We observe that SquareCB.G performs the best under full information graph and performs worst under bandit graph. Under the cops-and-robbers graph, much of the gap between bandit and full information is eliminated. This improvement demonstrates the benefit of utilizing graph feedback for accelerating learning.

### 5.2 Comparison between SquareCB.G and SquareCB

In this subsection, we compare the effectiveness of SquareCB.G with the SquareCB algorithm. To ensure a fair comparison, both algorithms update the regressor using the same feedbacks based on the graph. The only distinction lies in how they calculate the action probability distribution. We summarize the main results here and leave the implementation details in Appendix C.2.

#### 5.2.1 Results on Random Directed Self-aware Graphs

We conduct experiments on RCV1 dataset using random directed self-aware feedback graphs. Specifically, the diagonal elements are all 1, and off-diagonal entries are drawn from a Bernoulli( $\frac{3}{4}$ )

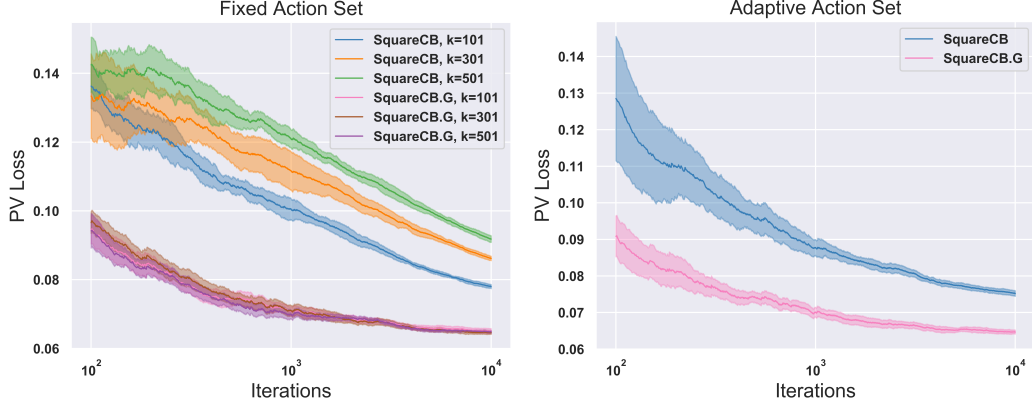

Figure 2: Performance comparison between SquareCB.G and SquareCB on synthetic inventory dataset. **Left figure:** Results under fixed discretized action set. **Right figure:** Results under adaptive discretization of the action set. Both figures show the superiority of SquareCB.G compared with SquareCB.

distribution. The results are presented in the right part of Figure 1. Our SquareCB.G consistently outperforms SquareCB and demonstrates lower variance, particularly when the number of iterations was small. This is because when there are fewer samples available to train the regressor, it is more crucial to design an effective algorithm that can leverage the graph feedback information.

## 5.2.2 Results on Synthetic Inventory Dataset

In the inventory graph experiments, we create a synthetic inventory dataset and design a loss function for each inventory level  $a_t \in [0, 1]$  with demand  $d_t \in [0, 1]$ . Since the action set  $[0, 1]$  is continuous, we discretize the action set in two different ways to apply the algorithms.

**Fixed discretized action set.** In this setting, we discretize the action set using fixed grid size  $\varepsilon \in \{\frac{1}{100}, \frac{1}{300}, \frac{1}{500}\}$ , which leads to a finite action set  $\mathcal{A}$  of size  $\frac{1}{\varepsilon} + 1$ . Note that according to Theorem 3.2, our regret *does not* scale with the size of the action set (to within polylog factors), as the independence number is always 1. The results are shown in the left part of Figure 2.

We remark several observations from the results. First, our algorithm SquareCB.G outperforms SquareCB for all choices  $K \in \{101, 301, 501\}$ . This indicates that SquareCB.G utilizes a better exploration scheme and effectively leverages the structure of  $G_{\text{inv}}$ . Second, we observe that SquareCB.G indeed does not scale with the size of the discretized action set  $\mathcal{A}$ , since under different discretization scales, SquareCB.G has similar performances and the slight differences are from the improved approximation error with finer discretization. This matches the theoretical guarantee that we prove in Theorem 3.2. On the other hand, SquareCB does perform worse when the size of the action set increases, matching its theoretical guarantee which scales with the square root of the size of the action set.

**Adaptively changing action set.** In this setting, we adaptively discretize the action set  $[0, 1]$  according to the index of the current round. Specifically, for SquareCB.G, we uniformly discretize the action set  $[0, 1]$  with size  $\lceil \sqrt{t} \rceil$ , whose total discretization error is  $\mathcal{O}(\sqrt{T})$  due to the Lipschitzness of the loss function. For SquareCB, to optimally balance the dependency on the size of the action set and the discretization error, we uniformly discretize the action set  $[0, 1]$  into  $\lceil t^{\frac{1}{3}} \rceil$  actions. The results are illustrated in the right part of Figure 2. We can observe that SquareCB.G consistently outperforms SquareCB by a clear margin.

## 6 Related Work

Multi-armed bandits with feedback graphs have been extensively studied. An early example is the apple tasting problem of Helmbold et al. [2000]. The general formulation was introduced by

Mannor and Shamir [2011]. Alon et al. [2015] characterized the minimax rates in terms of graph-theoretic quantities. Follow-on work includes relaxing the assumption that the graph is observed prior to decision [Cohen et al., 2016]; analyzing the distinction between the stochastic and adversarial settings [Alon et al., 2017]; considering stochastic feedback graphs [Li et al., 2020, Esposito et al., 2022]; instance-adaptivity [Ito et al., 2022]; data-dependent regret bound [Lykouris et al., 2018, Lee et al., 2020]; and high-probability regret under adaptive adversary [Neu, 2015, Luo et al., 2023].

The contextual bandit problem with feedback graphs has received relatively less attention. Wang et al. [2021] provide algorithms for adversarial linear bandits with uninformed graphs and stochastic contexts. However, this work assumes several unrealistic assumptions on both the policy class and the context space and is not comparable to our setting, since we consider the informed graph setting with adversarial context. Singh et al. [2020] study a stochastic linear bandits with informed feedback graphs and are able to improve over the instance-optimal regret bound for bandits derived in [Lattimore and Szepesvari, 2017] by utilizing the additional graph-based feedbacks.

Our work is also closely related to the recent progress in designing efficient algorithms for classic contextual bandits. Starting from [Langford and Zhang, 2007], numerous works have been done to the development of practically efficient algorithms, which are based on reduction to either cost-sensitive classification oracles [Dudík et al., 2011, Agarwal et al., 2014] or online regression oracles [Foster and Rakhlin, 2020, Foster et al., 2020, 2021, Zhu and Mineiro, 2022]. Following the latter trend, our work assumes access to an online regression oracle and extends the classic bandit problems to the bandits with general feedback graphs.

## 7 Discussion

In this paper, we consider the design of practical contextual bandits algorithm with provable guarantees. Specifically, we propose the first efficient algorithm that achieves near-optimal regret bound for contextual bandits with general directed feedback graphs with an online regression oracle.

While we study the informed graph feedback setting, where the entire feedback graph is exposed to the algorithm prior to each decision, many practical problems of interest are possibly uninformed graph feedback problems, where the graph is unknown at the decision time. It is unclear how to formulate an analogous minimax problem to Eq. (1) under the uninformed setting. One idea is to consume the additional feedback in the online regressor and adjust the prediction loss to reflect this additional structure, e.g., using the more general version of the E2D framework which incorporates arbitrary side observations [Foster et al., 2021]. Cohen et al. [2016] consider this uninformed setting in the non-contextual case and prove a sharp distinction between the adversarial and stochastic settings: even if the graphs are all strongly observable with bounded independence number, in the adversarial setting the minimax regret is  $\Theta(T)$  whereas in the stochastic setting the minimax regret is  $\Theta(\sqrt{\alpha T})$ . Intriguingly, our setting is semi-adversarial due to realizability of the mean loss, and therefore it is apriori unclear whether the negative adversarial result applies.

In addition, bandits with graph feedback problems often present with associated policy constraints, e.g., for the apple tasting problem, it is natural to rate limit the informative action. Therefore, another interesting direction is to combine our algorithm with the recent progress in contextual bandits with knapsack [Slivkins and Foster, 2022], leading to more practical algorithms.

## References

- Alekh Agarwal, Miroslav Dudík, Satyen Kale, John Langford, and Robert Schapire. Contextual bandit learning with predictable rewards. In *Artificial Intelligence and Statistics*, pages 19–26. PMLR, 2012.
- Alekh Agarwal, Daniel Hsu, Satyen Kale, John Langford, Lihong Li, and Robert Schapire. Taming the monster: A fast and simple algorithm for contextual bandits. In *International Conference on Machine Learning*, pages 1638–1646. PMLR, 2014.
- Noga Alon, Nicolo Cesa-Bianchi, Claudio Gentile, and Yishay Mansour. From bandits to experts: A tale of domination and independence. *Advances in Neural Information Processing Systems*, 26, 2013.

343 Noga Alon, Nicolo Cesa-Bianchi, Ofer Dekel, and Tomer Koren. Online learning with feedback  
344 graphs: Beyond bandits. In *Conference on Learning Theory*, pages 23–35. PMLR, 2015.

345 Noga Alon, Nicolo Cesa-Bianchi, Claudio Gentile, Shie Mannor, Yishay Mansour, and Ohad Shamir.  
346 Nonstochastic multi-armed bandits with graph-structured feedback. *SIAM Journal on Computing*,  
347 46(6):1785–1826, 2017.

348 Peter Auer, Nicolo Cesa-Bianchi, Yoav Freund, and Robert E Schapire. The nonstochastic multiarmed  
349 bandit problem. *SIAM journal on computing*, 32(1):48–77, 2002.

350 Djallel Bouneffouf, Irina Rish, and Charu Aggarwal. Survey on applications of multi-armed and  
351 contextual bandits. In *2020 IEEE Congress on Evolutionary Computation (CEC)*, pages 1–8. IEEE,  
352 2020.

353 Alon Cohen, Tamir Hazan, and Tomer Koren. Online learning with feedback graphs without the  
354 graphs. In *International Conference on Machine Learning*, pages 811–819. PMLR, 2016.

355 Miroslav Dudik, Daniel Hsu, Satyen Kale, Nikos Karampatziakis, John Langford, Lev Reyzin, and  
356 Tong Zhang. Efficient optimal learning for contextual bandits. In *Proceedings of the Twenty-Seventh  
357 Conference on Uncertainty in Artificial Intelligence*, pages 169–178, 2011.

358 Emmanuel Esposito, Federico Fusco, Dirk van der Hoeven, and Nicolò Cesa-Bianchi. Learning on  
359 the edge: Online learning with stochastic feedback graphs. In *Advances in Neural Information  
360 Processing Systems*, 2022.

361 Dylan Foster and Alexander Rakhlin. Beyond ucb: Optimal and efficient contextual bandits with  
362 regression oracles. In *International Conference on Machine Learning*, pages 3199–3210. PMLR,  
363 2020.

364 Dylan Foster, Alekh Agarwal, Miroslav Dudik, Haipeng Luo, and Robert Schapire. Practical  
365 contextual bandits with regression oracles. In *International Conference on Machine Learning*,  
366 pages 1539–1548. PMLR, 2018.

367 Dylan J Foster and Akshay Krishnamurthy. Efficient first-order contextual bandits: Prediction,  
368 allocation, and triangular discrimination. *Advances in Neural Information Processing Systems*, 34:  
369 18907–18919, 2021.

370 Dylan J Foster, Claudio Gentile, Mehryar Mohri, and Julian Zimmert. Adapting to misspecification in  
371 contextual bandits. *Advances in Neural Information Processing Systems*, 33:11478–11489, 2020.

372 Dylan J Foster, Sham M Kakade, Jian Qian, and Alexander Rakhlin. The statistical complexity of  
373 interactive decision making. *arXiv preprint arXiv:2112.13487*, 2021.

374 David P Helmbold, Nicholas Littlestone, and Philip M Long. Apple tasting. *Information and  
375 Computation*, 161(2):85–139, 2000.

376 Shinji Ito, Taira Tsuchiya, and Junya Honda. Nearly optimal best-of-both-worlds algorithms for  
377 online learning with feedback graphs. In *Advances in Neural Information Processing Systems*,  
378 2022.

379 John Langford and Tong Zhang. The epoch-greedy algorithm for contextual multi-armed bandits.  
380 *Advances in neural information processing systems*, 20(1):96–1, 2007.

381 John Langford, Lihong Li, and Alex Strehl. Vowpal wabbit online learning project, 2007.

382 Tor Lattimore and Csaba Szepesvari. The end of optimism? an asymptotic analysis of finite-armed  
383 linear bandits. In *Artificial Intelligence and Statistics*, pages 728–737. PMLR, 2017.

384 Chung-Wei Lee, Haipeng Luo, and Mengxiao Zhang. A closer look at small-loss bounds for bandits  
385 with graph feedback. In *Conference on Learning Theory*, pages 2516–2564. PMLR, 2020.

386 David D Lewis, Yiming Yang, Tony Russell-Rose, and Fan Li. Rcv1: A new benchmark collection  
387 for text categorization research. *Journal of machine learning research*, 5(Apr):361–397, 2004.

388 Shuai Li, Wei Chen, Zheng Wen, and Kwong-Sak Leung. Stochastic online learning with probabilistic  
389 graph feedback. In *Proceedings of the AAAI Conference on Artificial Intelligence*, volume 34,  
390 pages 4675–4682, 2020.

391 Haipeng Luo, Hanghang Tong, Mengxiao Zhang, and Yuheng Zhang. Improved high-probability  
392 regret for adversarial bandits with time-varying feedback graphs. In *International Conference on*  
393 *Algorithmic Learning Theory*, pages 1074–1100. PMLR, 2023.

394 Thodoris Lykouris, Karthik Sridharan, and Éva Tardos. Small-loss bounds for online learning with  
395 partial information. In *Conference on Learning Theory*, pages 979–986. PMLR, 2018.

396 Shie Mannor and Ohad Shamir. From bandits to experts: On the value of side-observations. *Advances*  
397 *in Neural Information Processing Systems*, 24, 2011.

398 Gergely Neu. Explore no more: Improved high-probability regret bounds for non-stochastic bandits.  
399 *Advances in Neural Information Processing Systems*, 28, 2015.

400 Adam Paszke, Sam Gross, Francisco Massa, Adam Lerer, James Bradbury, Gregory Chanan, Trevor  
401 Killeen, Zeming Lin, Natalia Gimelshein, Luca Antiga, et al. Pytorch: An imperative style,  
402 high-performance deep learning library. *Advances in neural information processing systems*, 32,  
403 2019.

404 Mark Rucker, Joran T Ash, John Langford, Paul Mineiro, and Ida Momennejad. Eigen memory tree.  
405 *arXiv preprint arXiv:2210.14077*, 2022.

406 David Simchi-Levi and Yunzong Xu. Bypassing the monster: A faster and simpler optimal algorithm  
407 for contextual bandits under realizability. *Mathematics of Operations Research*, 2021.

408 Rahul Singh, Fang Liu, Xin Liu, and Ness Shroff. Contextual bandits with side-observations. *arXiv*  
409 *preprint arXiv:2006.03951*, 2020.

410 Aleksandrs Slivkins and Dylan Foster. Efficient contextual bandits with knapsacks via regression.  
411 *arXiv preprint arXiv:2211.07484*, 2022.

412 Dirk van der Hoeven, Federico Fusco, and Nicolò Cesa-Bianchi. Beyond bandit feedback in online  
413 multiclass classification. *Advances in Neural Information Processing Systems*, 34:13280–13291,  
414 2021.

415 Vladimir G Vovk. A game of prediction with expert advice. In *Proceedings of the eighth annual*  
416 *conference on Computational learning theory*, pages 51–60, 1995.

417 Lingda Wang, Bingcong Li, Huozhi Zhou, Georgios B Giannakis, Lav R Varshney, and Zhizhen Zhao.  
418 Adversarial linear contextual bandits with graph-structured side observations. In *Proceedings of*  
419 *the AAAI Conference on Artificial Intelligence*, pages 10156–10164, 2021.

420 Yinglun Zhu and Paul Mineiro. Contextual bandits with smooth regret: Efficient learning in continu-  
421 ous action spaces. In *International Conference on Machine Learning*, pages 27574–27590. PMLR,  
422 2022.

## 423 Broader Impact

424 This work is mostly theoretical, and we do not foresee any negative ethical or societal outcomes. Our  
 425 algorithms can be applied for many applications with context and partial information feedback such  
 426 as recommendation systems.

## 427 A Omitted Details in Section 3

428 **Theorem 3.1.** Suppose  $\overline{\text{dec}}_\gamma(p_t; \hat{f}_t, x_t, G_t) \leq C\gamma^{-\beta}$  for all  $t \in [T]$  and some  $\beta > 0$ , [Algorithm 1](#)  
 429 with  $\gamma = \max\{4, (CT)^{\frac{1}{\beta+1}} \mathbf{Reg}_{\text{Sq}}^{-\frac{1}{\beta+1}}\}$  guarantees that  $\mathbb{E}[\mathbf{Reg}_{\text{CB}}] \leq \mathcal{O}\left(C^{\frac{1}{\beta+1}} T^{\frac{1}{\beta+1}} \mathbf{Reg}_{\text{Sq}}^{\frac{\beta}{\beta+1}}\right)$ .

430 *Proof.* Following [\[Foster et al., 2020\]](#), we decompose  $\mathbf{Reg}_{\text{CB}}$  as follows:

$$\begin{aligned}
 & \mathbb{E}[\mathbf{Reg}_{\text{CB}}] \\
 &= \mathbb{E}\left[\sum_{t=1}^T f^*(x_t, a_t) - \sum_{t=1}^T f^*(x_t, \pi^*(x_t))\right] \\
 &= \mathbb{E}\left[\sum_{t=1}^T \left(f^*(x_t, a_t) - f^*(x_t, \pi^*(x_t)) - \frac{\gamma}{4} \mathbb{E}_{A \sim G_t(\cdot|a_t)} \left[\sum_{a \in A} \left(\hat{f}_t(x_t, a) - f^*(x_t, a)\right)^2\right]\right)\right] \\
 &\quad + \frac{\gamma}{4} \mathbb{E}\left[\sum_{t=1}^T \mathbb{E}_{A \sim G_t(\cdot|a_t)} \left[\sum_{a \in A} \left(\hat{f}_t(x_t, a) - f^*(x_t, a)\right)^2\right]\right] \\
 &\leq \mathbb{E}\left[\sum_{t=1}^T \max_{\substack{a^* \in [K] \\ f \in (\mathcal{X} \times [K] \mapsto \mathbb{R})}} \mathbb{E}_{a_t \sim p_t} \left[f(x_t, a_t) - f(x_t, a^*) - \frac{\gamma}{4} \mathbb{E}_{A \sim G_t(\cdot|a_t)} \left[\sum_{a \in A} \left(\hat{f}_t(x_t, a) - f(x_t, a)\right)^2\right]\right]\right] \\
 &\quad + \frac{\gamma}{4} \mathbb{E}\left[\sum_{t=1}^T \mathbb{E}_{A \sim G_t(\cdot|a_t)} \left[\sum_{a \in A} \left(\hat{f}_t(x_t, a) - f^*(x_t, a)\right)^2\right]\right] \\
 &= \mathbb{E}\left[\sum_{t=1}^T \overline{\text{dec}}_\gamma(p_t; \hat{f}_t, x_t, G_t)\right] + \frac{\gamma}{4} \mathbb{E}\left[\sum_{t=1}^T \mathbb{E}_{A \sim G_t(\cdot|a_t)} \left[\sum_{a \in A} \left(\hat{f}_t(x_t, a) - f^*(x_t, a)\right)^2\right]\right] \quad (8) \\
 &\leq CT\gamma^{-\beta} + \frac{\gamma}{4} \mathbb{E}\left[\sum_{t=1}^T \mathbb{E}_{A \sim G_t(\cdot|a_t)} \left[\sum_{a \in A} \left(\hat{f}_t(x_t, a) - f^*(x_t, a)\right)^2\right]\right].
 \end{aligned}$$

431 Next, since  $\mathbb{E}[\ell_{t,a} | x_t] = f^*(x_t, a)$  for all  $t \in [T]$  and  $a \in \mathcal{A}$ , we know that

$$\begin{aligned}
 & \mathbb{E}\left[\sum_{t=1}^T \mathbb{E}_{A \sim G_t(\cdot|a_t)} \left[\sum_{a \in A} \left(\hat{f}_t(x_t, a) - f^*(x_t, a)\right)^2\right]\right] \\
 &= \mathbb{E}\left[\sum_{t=1}^T \mathbb{E}_{A \sim G_t(\cdot|a_t)} \left[\sum_{a \in A} \left(\hat{f}_t(x_t, a) - \ell_{t,a}\right)^2 - \sum_{a \in A} \left(f^*(x_t, a) - \ell_{t,a}\right)^2\right]\right] \leq \mathbf{Reg}_{\text{Sq}}, \quad (9)
 \end{aligned}$$

432 where the final inequality is due to [Assumption 2](#).

433 Therefore, we have

$$\mathbb{E}[\mathbf{Reg}_{\text{CB}}] \leq CT\gamma^{-\beta} + \frac{\gamma}{4} \mathbf{Reg}_{\text{Sq}}.$$

434 Picking  $\gamma = \max\left\{4, \left(\frac{CT}{\mathbf{Reg}_{\text{Sq}}}\right)^{\frac{1}{\beta+1}}\right\}$ , we obtain that

$$\mathbb{E}[\mathbf{Reg}_{\text{CB}}] \leq \mathcal{O}\left(C^{\frac{1}{\beta+1}} T^{\frac{1}{\beta+1}} \mathbf{Reg}_{\text{Sq}}^{\frac{\beta}{\beta+1}}\right).$$

435

□

### 436 A.1 Proof of Theorem 3.2

437 Before proving Theorem 3.2, we first show the following key lemma, which is useful in proving  
 438 that  $\overline{\text{dec}}_\gamma(p; \hat{f}, x, G)$  is convex for both strongly and weakly observable feedback graphs  $G$ . We  
 439 highlight that the convexity of  $\overline{\text{dec}}_\gamma(p; \hat{f}, x, G)$  is crucial for both proving the upper bound of  
 440  $\min_{p \in \Delta(K)} \overline{\text{dec}}_\gamma(p; \hat{f}, x, G)$  and showing the efficiency of Algorithm 1.

441 **Lemma A.1.** Suppose  $u, v, x \in \mathbb{R}^d$  with  $\langle v, x \rangle > 0$ . Then both  $g(x) = \frac{\langle u, x \rangle^2}{\langle v, x \rangle}$  and  $h(x) = \frac{(1 - \langle u, x \rangle)^2}{\langle v, x \rangle}$   
 442 are convex in  $x$ .

*Proof.* The function  $f(x, y) = x^2/y$  is convex for  $y > 0$  due to

$$\nabla^2 f(x, y) = \frac{2}{y^3} \begin{bmatrix} y \\ -x \end{bmatrix} \begin{bmatrix} y \\ -x \end{bmatrix}^\top \succeq 0.$$

443 By composition with affine functions, both  $g(x) = f(\langle u, x \rangle, \langle v, x \rangle)$  and  $h(x) = f(1 - \langle u, x \rangle, \langle v, x \rangle)$   
 444 are convex.  $\square$

445 **Theorem 3.2** (Strongly observable graphs). Suppose that the feedback graph  $G_t$  is deterministic and  
 446 strongly observable with independence number no more than  $\alpha$ . Then Algorithm 1 guarantees that  
 447  $\overline{\text{dec}}_\gamma(p_t; \hat{f}_t, x_t, G_t) \leq \mathcal{O}\left(\frac{\alpha \log(K\gamma)}{\gamma}\right)$ .

448 *Proof.* For conciseness, we omit the subscript  $t$ . Direct calculation shows that for all  $a^* \in [K]$ ,

$$\begin{aligned} & \mathbb{E}_{a \sim p} \left[ f^*(x, a) - f^*(x, a^*) - \frac{\gamma}{4} \sum_{a' \in N^{\text{in}}(G, a)} (\hat{f}(x, a') - f^*(x, a'))^2 \right] \\ &= \sum_{a=1}^K p_a f^*(x, a) - f^*(x, a^*) - \frac{\gamma}{4} \sum_{a=1}^K W_a (\hat{f}(x, a) - f^*(x, a))^2, \end{aligned}$$

449 where  $W_a = \sum_{a' \in N^{\text{in}}(G, a)} p_{a'}$ . Therefore, taking the gradient over  $f^*(x, \cdot)$  and we know that

$$\begin{aligned} & \sup_{f^* \in (\mathcal{X} \times [K] \mapsto \mathbb{R})} \left[ \sum_{a=1}^K p_a f^*(x, a) - f^*(x, a^*) - \frac{\gamma}{4} \sum_{a=1}^K W_a (\hat{f}(x, a) - f^*(x, a))^2 \right] \\ &= \sum_{a=1}^K p_a \hat{f}(x, a) - \hat{f}(x, a^*) + \frac{1}{\gamma} \|p - e_{a^*}\|_{\text{diag}(W)^{-1}}^2. \end{aligned}$$

450 Then, denote  $\hat{f} \in \mathbb{R}^K$  to be  $\hat{f}(x, \cdot)$  and consider the following minimax form:

$$\begin{aligned} & \inf_{p \in \Delta(K)} \sup_{a^* \in \mathcal{A}} \left\{ \sum_{a=1}^K p_a \hat{f}(x, a) - \hat{f}(x, a^*) + \frac{1}{\gamma} \|p - e_{a^*}\|_{\text{diag}(W)^{-1}}^2 \right\} \\ &= \min_{p \in \Delta(K)} \max_{a^* \in \mathcal{A}} \left\{ \sum_{a=1}^K p_a \hat{f}(x, a) - \hat{f}(x, a^*) + \frac{1}{\gamma} \sum_{a \neq a^*} \frac{p_a^2}{W_a} + \frac{1}{\gamma} \frac{(1 - p_{a^*})^2}{W_{a^*}} \right\} \end{aligned} \quad (10)$$

$$= \min_{p \in \Delta_K} \max_{q \in \Delta_K} \left\{ \sum_{a=1}^K (p_a - q_a) \hat{f}_a + \frac{1}{\gamma} \sum_{a=1}^K \frac{p_a^2(1 - q_a)}{W_a} + \sum_{a=1}^K \frac{q_a(1 - p_a)^2}{\gamma W_a} \right\} \quad (11)$$

$$= \max_{q \in \Delta_K} \min_{p \in \Delta_K} \left\{ \sum_{a=1}^K (p_a - q_a) \hat{f}_a + \frac{1}{\gamma} \sum_{a=1}^K \frac{p_a^2(1 - q_a)}{W_a} + \sum_{a=1}^K \frac{q_a(1 - p_a)^2}{\gamma W_a} \right\}, \quad (12)$$

451 where the last equality is due to Sion's minimax theorem and the fact that Eq. (10) is convex in  
 452  $p \in \Delta(K)$  by applying Lemma A.1 with  $u = e_a$  and  $v = g_a$  for each  $a \in [K]$ , where  $g_a \in \{0, 1\}^K$   
 453 is defined as  $g_{a,i} = \mathbb{1}\{(i, a) \in E\}$ ,  $G = ([K], E)$ ,  $\forall i \in [K]$ .

454 Choose  $p_a = (1 - \frac{1}{\gamma})q_a + \frac{1}{\gamma K}$  for all  $a \in [K]$ . Let  $S$  be the set of nodes in  $[K]$  that have a self-loop.  
 455 Then we can upper bound the value above as follows:

$$\begin{aligned}
& \max_{q \in \Delta(K)} \min_{p \in \Delta(K)} \left\{ \sum_{a=1}^K (p_a - q_a) \hat{f}_a + \frac{1}{\gamma} \sum_{a=1}^K \frac{p_a^2 (1 - q_a)}{W_a} + \sum_{a=1}^K \frac{q_a (1 - p_a)^2}{\gamma W_a} \right\} \\
& \leq \max_{q \in \Delta(K)} \left\{ \frac{2}{\gamma} + \frac{1}{\gamma} \sum_{a=1}^K \frac{\left( (1 - \frac{1}{\gamma})q_a + \frac{1}{\gamma K} \right)^2 (1 - q_a) + q_a \left( 1 - (1 - \frac{1}{\gamma})q_a - \frac{1}{\gamma K} \right)^2}{W_a} \right\} \\
& \leq \max_{q \in \Delta(K)} \left\{ \frac{2}{\gamma} + \frac{1}{\gamma} \sum_{a=1}^K \frac{2 \left( (1 - \frac{1}{\gamma})^2 q_a^2 + \frac{1}{\gamma^2 K^2} \right) (1 - q_a) + q_a \left( 1 - (1 - \frac{1}{\gamma})q_a \right)^2}{W_a} \right\} \\
& \leq \max_{q \in \Delta(K)} \left\{ \frac{2}{\gamma} + \frac{2}{\gamma^2} + \frac{1}{\gamma} \sum_{a=1}^K \frac{2q_a^2 (1 - q_a) + 2q_a (1 - q_a)^2 + \frac{2q_a^3}{\gamma^2}}{W_a} \right\} \\
& \quad (W_a = \sum_{j \in N^{\text{in}}(G,a)} p_j \geq \frac{1}{\gamma K} \text{ for all } a \in [K]) \\
& \leq \max_{q \in \Delta(K)} \left\{ \frac{2}{\gamma} + \frac{2}{\gamma^2} + \frac{2}{\gamma} \sum_{a=1}^K \frac{q_a (1 - q_a)}{W_a} + \frac{2}{\gamma^3} \sum_{a=1}^K \frac{q_a^3}{W_a} \right\} \\
& = \max_{q \in \Delta(K)} \left\{ \frac{2}{\gamma} + \frac{2}{\gamma^2} + \frac{2}{\gamma} \sum_{a=1}^K \frac{q_a (1 - q_a)}{W_a} + \frac{2}{\gamma^3} \sum_{a \in S} \frac{q_a^3}{W_a} + \frac{2}{\gamma^3} \sum_{a \notin S} \frac{q_a^3}{W_a} \right\} \quad (13) \\
& \leq \max_{q \in \Delta(K)} \left\{ \frac{2}{\gamma} + \frac{2}{\gamma^2} + \frac{2}{\gamma} \sum_{a=1}^K \frac{q_a (1 - q_a)}{W_a} + \frac{2}{\gamma^3} \sum_{a \in S} q_a^2 + \frac{2}{\gamma^3} \sum_{a \notin S} \frac{q_a^3}{\frac{K-1}{\gamma K}} \right\} \\
& \quad (\text{if } a \notin S, W_a = 1 - p_a \geq \frac{K-1}{\gamma K}) \\
& \leq \max_{q \in \Delta(K)} \left\{ \frac{8}{\gamma} + \frac{2}{\gamma} \sum_{a=1}^K \frac{q_a (1 - q_a)}{W_a} \right\}. \quad (K \geq 2)
\end{aligned}$$

456 Next we bound  $\frac{2q_a(1-q_a)}{W_a}$  for each  $a \in [K]$ . If  $a \in [K] \setminus S$ , we have  $W_a = 1 - p_a$  and

$$\frac{2q_a(1-q_a)}{W_a} \leq \frac{2q_a(1-q_a)}{1 - (1 - \frac{1}{\gamma})q_a - \frac{1}{\gamma K}} \leq \frac{2q_a(1-q_a)}{(1 - \frac{1}{\gamma})(1 - q_a) + \frac{K-1}{\gamma K}} \leq \frac{2}{1 - \frac{1}{\gamma}} q_a \leq 4q_a. \quad (14)$$

457 If  $a \in S$ , we know that

$$\begin{aligned}
\sum_{a \in S} \frac{2q_a(1-q_a)}{W_a} & \leq \sum_{a \in S} \frac{2q_a(1-q_a)}{\sum_{j \in N^{\text{in}}(G,a)} ((1 - \frac{1}{\gamma})q_j + \frac{1}{\gamma K})} \\
& \leq \frac{\gamma}{\gamma - 1} \sum_{a \in S} \frac{2((1 - \frac{1}{\gamma})q_a + \frac{1}{\gamma K})(1 - q_a)}{\sum_{j \in N^{\text{in}}(G,a)} ((1 - \frac{1}{\gamma})q_j + \frac{1}{\gamma K})} \\
& \leq 4 \sum_{a \in S} \frac{((1 - \frac{1}{\gamma})q_a + \frac{1}{\gamma K})}{\sum_{j \in N^{\text{in}}(G,a)} ((1 - \frac{1}{\gamma})q_j + \frac{1}{\gamma K})} \leq \mathcal{O}(\alpha \log(K\gamma)), \quad (15)
\end{aligned}$$

458 where the last inequality is due to Lemma 5 in Alon et al. [2015]. We include this lemma (Lemma D.1)  
 459 for completeness. Combining all the above inequalities, we obtain that

$$\begin{aligned}
& \inf_{p \in \Delta(K)} \sup_{a^* \in \mathcal{A}} \left\{ \sum_{a=1}^K p_a \hat{f}(x, a) - \hat{f}(x, a^*) + \frac{1}{\gamma} \|p - e_{a^*}\|_{\text{diag}(W)^{-1}}^2 \right\} \\
& = \max_{q \in \Delta(K)} \min_{p \in \Delta(K)} \left\{ \sum_{a=1}^K (p_a - q_a) \hat{f}_a + \frac{1}{\gamma} \sum_{a=1}^K \frac{p_a^2 (1 - q_a)}{W_a} + \sum_{a=1}^K \frac{q_a (1 - p_a)^2}{\gamma W_a} \right\}
\end{aligned}$$

$$\leq \max_{q \in \Delta(K)} \left\{ \frac{8}{\gamma} + \frac{2}{\gamma} \sum_{a=1}^K \frac{q_a(1-q_a)}{W_a} \right\} \leq \mathcal{O} \left( \frac{\alpha \log(K\gamma)}{\gamma} \right).$$

460

□

## 461 A.2 Proof of Theorem 3.4

462 **Theorem 3.4** (Weakly observable graphs). *Suppose that the feedback graph  $G_t$  is deterministic and*  
 463 *weakly observable with weak domination number no more than  $d$ . Then Algorithm 1 with  $\gamma \geq 16d$*   
 464 *guarantees that  $\overline{\text{dec}}_\gamma(p_t; \hat{f}_t, x_t, G_t) \leq \mathcal{O} \left( \sqrt{\frac{d}{\gamma}} + \frac{\tilde{\alpha} \log(K\gamma)}{\gamma} \right)$ , where  $\tilde{\alpha}$  is the independence number*  
 465 *of the subgraph induced by nodes with self-loops in  $G_t$ .*

466 *Proof.* Similar to the strongly observable graphs setting, for weakly observable graphs, we know that

$$\begin{aligned} & \overline{\text{dec}}_\gamma(p; \hat{f}, x, G) \\ &= \max_{q \in \Delta_K} \min_{p \in \Delta_K} \left\{ \sum_{a=1}^K (p_a - q_a) \hat{f}_a + \frac{1}{\gamma} \sum_{a=1}^K \frac{p_a^2(1-q_a)}{W_a} + \sum_{a=1}^K \frac{q_a(1-p_a)^2}{\gamma W_a} \right\}. \end{aligned} \quad (16)$$

467 Choose  $p_a = (1 - \frac{1}{\gamma} - \eta d)q_a + \frac{1}{\gamma K} + \eta \mathbb{1}\{a \in D\}$  where  $D$  with  $|D| = d$  is the minimum weak  
 468 dominating set of  $G$  and  $0 < \eta \leq \frac{1}{4d}$  is some parameter to be chosen later. Substituting the form of  $p$   
 469 to Eq. (16) and using the fact that  $|\hat{f}_a| \leq 1$  for all  $a \in [K]$ , we can obtain that

$$\begin{aligned} & \overline{\text{dec}}_\gamma(p; \hat{f}, x, G) \\ & \leq \max_{q \in \Delta_K} \left\{ \frac{2}{\gamma} + \eta d + \frac{1}{\gamma} \sum_{a=1}^K \frac{p_a^2(1-q_a)}{W_a} + \sum_{a=1}^K \frac{q_a(1-p_a)^2}{\gamma W_a} \right\}. \end{aligned}$$

470 Then we can upper bound the value above as follows:

$$\begin{aligned} & \overline{\text{dec}}_\gamma(p; \hat{f}, x, G) \\ & \leq \max_{q \in \Delta_K} \left\{ \frac{2}{\gamma} + \eta d + \frac{1}{\gamma} \sum_{a=1}^K \frac{\left( (1 - \frac{1}{\gamma} - \eta d)q_a + \frac{1}{\gamma K} + \eta \mathbb{1}\{a \in D\} \right)^2 (1-q_a)}{W_a} \right. \\ & \quad \left. + \sum_{a=1}^K \frac{q_a \left( 1 - (1 - \frac{1}{\gamma} - \eta d)q_a \right)^2}{W_a} \right\} \\ & \leq \max_{q \in \Delta_K} \left\{ \frac{2}{\gamma} + \eta d + \frac{1}{\gamma} \sum_{a \notin D} \frac{\left( q_a + \frac{1}{\gamma K} \right)^2 (1-q_a) + q_a \left( (1-q_a) + \frac{1}{\gamma} q_a + \eta d q_a \right)^2}{W_a} \right. \\ & \quad \left. + \frac{1}{\gamma} \sum_{a \in D} \frac{\left( q_a + \frac{1}{\gamma K} + \eta \right)^2 (1-q_a) + q_a \left( (1-q_a) + \frac{1}{\gamma} q_a + \eta d q_a \right)^2}{W_a} \right\} \\ & \leq \max_{q \in \Delta_K} \left\{ \frac{2}{\gamma} + \eta d + \frac{1}{\gamma} \sum_{a \notin D} \frac{2 \left( q_a^2 + \frac{1}{\gamma^2 K^2} \right) (1-q_a) + 3q_a \left( (1-q_a)^2 + \frac{q_a^2}{\gamma^2} + \eta^2 d^2 q_a^2 \right)}{W_a} \right. \\ & \quad \left. + \frac{1}{\gamma} \sum_{a \in D} \frac{3 \left( q_a^2 + \frac{1}{\gamma^2 K^2} + \eta^2 \right) (1-q_a) + 3q_a \left( (1-q_a)^2 + \frac{q_a^2}{\gamma^2} + \eta^2 d^2 q_a^2 \right)}{W_a} \right\}. \end{aligned} \quad (17)$$

471 Now consider  $a \in D$ . If  $a \in S$ , then we know that  $W_a \geq \eta$ ; Otherwise, we know that this node can  
 472 be observed by at least one node in  $D$ , meaning that  $W_a \geq \eta$ . Combining the two cases above, we

473 know that

$$\begin{aligned}
& \frac{1}{\gamma} \sum_{a \in D} \frac{3 \left( q_a^2 + \frac{1}{\gamma^2 K^2} + \eta^2 \right) (1 - q_a) + 3q_a \left( (1 - q_a)^2 + \frac{1}{\gamma^2} q_a^2 + \eta^2 d^2 q_a^2 \right)}{W_a} \\
& \leq \frac{3}{\eta \gamma} \sum_{a \in D} \left[ \left( q_a^2 + \frac{1}{\gamma^2 K^2} + \eta^2 \right) (1 - q_a) + q_a \left( (1 - q_a)^2 + \frac{1}{\gamma^2} q_a^2 + \eta^2 d^2 q_a^2 \right) \right] \\
& \leq \frac{3}{\eta \gamma} \sum_{a \in D} \left[ q_a - q_a^2 + \frac{1}{\gamma^2} q_a^3 + \eta^2 d^2 q_a^3 + \frac{1}{\gamma^2 K^2} + \eta^2 \right] \\
& \leq \mathcal{O} \left( \frac{1}{\eta \gamma} + \frac{d\eta}{\gamma} + \frac{1}{\eta \gamma^3 K} \right) \quad (\eta \leq \frac{1}{4d} \text{ and } \gamma \geq 16d) \\
& \leq \mathcal{O} \left( \frac{1}{\eta \gamma} \right), \tag{18}
\end{aligned}$$

474 where the last inequality is because  $\eta \leq \frac{1}{4d}$  and  $\gamma \geq 16d$ . Consider  $a \notin D$ . Let  $S_0$  be the set of  
475 nodes which either have a self loop or can be observed by all the other node. Recall that  $S$  represents  
476 the set of nodes with a self-loop. Then similar to the derivation of Eq. (13), we know that for  $a \in S_0$ ,

$$\begin{aligned}
& \frac{1}{\gamma} \sum_{a \notin D, a \in S_0} \frac{2 \left( q_a^2 + \frac{1}{\gamma^2 K^2} \right) (1 - q_a) + 3q_a \left( (1 - q_a)^2 + \frac{q_a^2}{\gamma^2} + \eta^2 d^2 q_a^2 \right)}{W_a} \\
& \leq \frac{1}{\gamma} \sum_{a \notin D, a \in S_0} \frac{2q_a^2(1 - q_a) + 3q_a \left( (1 - q_a)^2 + \frac{q_a^2}{\gamma^2} + \eta^2 d^2 q_a^2 \right)}{W_a} + \mathcal{O} \left( \frac{1}{\gamma^2} + \frac{1}{\eta \gamma^3 K} \right) \\
& \quad (W_a \geq \frac{1}{\gamma K} \text{ if } a \in S \text{ and } W_a \geq \eta \text{ if } a \in [K] \setminus S) \\
& \leq \mathcal{O} \left( \frac{1}{\gamma} \sum_{a \in S_0, a \notin D} \frac{q_a(1 - q_a)}{W_a} + \frac{1}{\gamma^3} \sum_{a \in S, a \notin D} q_a^2 + \frac{1}{\gamma^3} \sum_{a \in S_0, a \notin D \cup S} \frac{q_a^3}{\frac{K-1}{\gamma K}} + \frac{1}{\gamma^2} + \frac{1}{\eta \gamma^3 K} \right) \\
& \quad + \mathcal{O} \left( \frac{1}{\gamma} \sum_{a \in S, a \notin D} \eta^2 d^2 q_a^2 + \frac{1}{\gamma} \sum_{a \in S_0, a \notin D \cup S} \frac{\eta^2 d^2 q_a^3}{\eta} \right) \\
& \quad (\text{for } a \in S_0, a \notin S, W_a \geq \max\{\frac{K-1}{\gamma K}, \eta\}) \\
& \leq \mathcal{O} \left( \frac{1}{\gamma} \sum_{a \in S_0, a \notin D} \frac{q_a(1 - q_a)}{W_a} + \frac{1}{\eta \gamma} \right). \tag{19}
\end{aligned}$$

477 For  $a \notin S_0$ , we know that  $W_a \geq \eta$ . Therefore,

$$\begin{aligned}
& \frac{1}{\gamma} \sum_{a \notin D \cup S_0} \frac{2 \left( q_a^2 + \frac{1}{\gamma^2 K^2} \right) (1 - q_a) + 3q_a \left( (1 - q_a)^2 + \frac{q_a^2}{\gamma^2} + \eta^2 d^2 q_a^2 \right)}{W_a} \\
& \leq \frac{1}{\gamma \eta} \sum_{a \notin D \cup S_0} \left( 2 \left( q_a^2 + \frac{1}{\gamma^2 K^2} \right) (1 - q_a) + 3q_a \left( (1 - q_a)^2 + \frac{q_a^2}{\gamma^2} + \frac{1}{16} q_a^2 \right) \right) \\
& \leq \frac{1}{\gamma \eta} \sum_{a \notin D \cup S_0} \left( 2q_a(1 - q_a) + \frac{1}{\gamma^2 K^2} + \frac{2q_a^3}{\gamma^2} + \frac{3}{16} q_a^3 \right) \\
& \leq \mathcal{O} \left( \frac{1}{\gamma \eta} \right). \tag{20}
\end{aligned}$$

478 Plugging Eq. (18), Eq. (19), and Eq. (20) to Eq. (17), we obtain that

$$\overline{\text{dec}}_\gamma(p; \hat{f}, x, G) \leq \mathcal{O} \left( \frac{1}{\gamma} + \eta d + \frac{1}{\gamma \eta} + \frac{1}{\gamma} \sum_{a \in S_0, a \notin D} \frac{q_a(1 - q_a)}{W_a} \right) \tag{21}$$

479 Consider the last term. If  $a \in S_0 \setminus S$ , similar to Eq. (14), we know that

$$\frac{q_a(1-q_a)}{W_a} \leq \frac{q_a(1-q_a)}{1 - (1 - \frac{1}{\gamma} - d\eta)q_a - \frac{1}{\gamma K}} \leq \frac{q_a(1-q_a)}{(1 - \frac{1}{\gamma} - \eta d)(1-q_a)} \leq \frac{1}{1 - \frac{1}{\gamma} - \eta d} q_a \leq \mathcal{O}(q_a),$$

480 where the last inequality is due to  $\gamma \geq 16d$  and  $\eta \leq \frac{1}{4d}$ . If  $a \in S$ , similar to Eq. (15), we know that

$$\begin{aligned} \sum_{a \in S} \frac{q_a(1-q_a)}{W_a} &\leq \sum_{a \in S} \frac{q_a(1-q_a)}{\sum_{j \in N^{\text{in}}(G,a)} ((1 - \frac{1}{\gamma} - \eta d)q_j + \frac{1}{\gamma K})} \\ &\leq \frac{\gamma}{\gamma - 1 - \gamma \eta d} \sum_{a \in S} \frac{((1 - \frac{1}{\gamma} - \eta d)q_a + \frac{1}{\gamma K})(1-q_a)}{\sum_{j \in N^{\text{in}}(G,a)} ((1 - \frac{1}{\gamma} - \eta d)q_j + \frac{1}{\gamma K})} \\ &\leq 2 \sum_{a \in S} \frac{\left((1 - \frac{1}{\gamma} - \eta d)q_a + \frac{1}{\gamma K}\right)}{\sum_{j \in N^{\text{in}}(G,a)} \left((1 - \frac{1}{\gamma} - \eta d)q_j + \frac{1}{\gamma K}\right)} \quad (\gamma \geq 4, \eta \leq \frac{1}{4d}) \\ &\leq \mathcal{O}(\tilde{\alpha} \log(K\gamma)), \end{aligned} \quad (22)$$

481 where the last inequality is again due to Lemma 5 in [Alon et al., 2015] and  $\tilde{\alpha}$  is the independence  
482 number of the subgraph induced by nodes with self-loops in  $G$ . Plugging Eq. (22) to Eq. (21) gives

$$\overline{\text{dec}}_\gamma(p; \hat{f}, x, G) \leq \mathcal{O}\left(\eta d + \frac{1}{\gamma \eta} + \frac{\tilde{\alpha} \log(K\gamma)}{\gamma}\right).$$

483 Picking  $\eta = \sqrt{\frac{1}{\gamma d}} \leq \frac{1}{4d}$  proves the result.  $\square$

484 Next, we prove Corollary 3.5 by combining Theorem 3.4 and Theorem 3.1.

485 **Corollary 3.5.** Suppose that  $G_t$  is deterministic, weakly observable, and has weak domination  
486 number no more than  $d$  for all  $t \in [T]$ . In addition, suppose that the independence number of the  
487 subgraph induced by nodes with self-loops in  $G_t$  is no more than  $\tilde{\alpha}$  for all  $t \in [T]$ . Then, Algorithm 1  
488 with  $\gamma = \max\{16d, \sqrt{\tilde{\alpha}T/\text{Reg}_{\text{Sq}}}, d^{\frac{1}{3}}T^{\frac{2}{3}}\text{Reg}_{\text{Sq}}^{-\frac{2}{3}}\}$  guarantees that  $\mathbb{E}[\text{Reg}_{\text{CB}}] \leq \tilde{\mathcal{O}}(d^{\frac{1}{3}}T^{\frac{2}{3}}\text{Reg}_{\text{Sq}}^{\frac{1}{3}} +$   
489  $\sqrt{\tilde{\alpha}T\text{Reg}_{\text{Sq}}})$ .

490 *Proof.* Combining Eq. (8), Eq. (9) and Theorem 3.4, we can bound  $\text{Reg}_{\text{CB}}$  as follows:

$$\mathbb{E}[\text{Reg}_{\text{CB}}] \leq \mathcal{O}\left(\sqrt{\frac{d}{\gamma}}T + \frac{\tilde{\alpha}T \log(K\gamma)}{\gamma} + \gamma \text{Reg}_{\text{CB}}\right).$$

491 Picking  $\gamma = \max\{16d, \sqrt{\tilde{\alpha}T/\text{Reg}_{\text{Sq}}}, d^{\frac{1}{3}}T^{\frac{2}{3}}\text{Reg}_{\text{Sq}}^{-\frac{2}{3}}\}$  finishes the proof.  $\square$

### 492 A.3 Python Solution to Eq. (5)

```
493 def makeProblem(nactions):
494     import cvxpy as cp
495
496     sqrtgammaG = cp.Parameter((nactions, nactions), nonneg=True)
497     sqrtgammafhat = cp.Parameter(nactions)
498     p = cp.Variable(nactions, nonneg=True)
499     sqrtgammaz = cp.Variable()
500     objective = cp.Minimize(sqrtgammafhat @ p + sqrtgammaz)
501     constraints = [
502         cp.sum(p) == 1
503     ] + [
504         cp.sum([
505             cp.quad_over_lin(eai - pi, vi)
506             for i, (pi, vi) in enumerate(zip(p, v))
507             for eai in (1 if i == a else 0,)
508         ]) <= sqrtgammafhat + sqrtgammaz
509         for v in (sqrtgammaG @ p,)
```

```

510         for a, sqrtgammafhata in enumerate(sqrtgammafhata)
511     ]
512     problem = cp.Problem(objective, constraints)
513     assert problem.is_dcp(dpp=True) # proof of convexity
514     return problem, sqrtgammaG, sqrtgammafhata, p, sqrtgammaaz

```

516 This particular formulation multiplies both sides of the constraint in Eq. (5) by  $\sqrt{\gamma}$  while scaling the  
517 objective by  $\sqrt{\gamma}$ . While mathematically equivalent to Eq. (5), empirically it has superior numerical  
518 stability for large  $\gamma$ . For additional stability, when using this routine we recommend subtracting off the  
519 minimum value from  $\hat{f}$ , which is equivalent to making the substitutions  $\sqrt{\gamma}\hat{f} \leftarrow \sqrt{\gamma}\hat{f} - \sqrt{\gamma}\min_a \hat{f}_a$   
520 and  $z \leftarrow z + \sqrt{\gamma}\min_a \hat{f}_a$  and then exploiting the  $1^\top p = 1$  constraint.

#### 521 A.4 Proof of Theorem 3.6

522 **Theorem 3.6.** Solving  $\operatorname{argmin}_{p \in \Delta(K)} \overline{\operatorname{dec}}_\gamma(p; \hat{f}, x, G)$  is equivalent to solving the following convex  
523 optimization problem.

$$\begin{aligned}
 & \min_{p \in \Delta(K), z} \quad p^\top \hat{f} + z & (5) \\
 & \text{subject to} \quad \forall a \in [K] : \frac{1}{\gamma} \|p - e_a\|_{\operatorname{diag}(G^\top p)^{-1}}^2 \leq \hat{f}(x, a) + z, \\
 & \quad \quad \quad G^\top p \succ 0,
 \end{aligned}$$

524 where  $\hat{f}$  in the objective is a shorthand for  $\hat{f}(x, \cdot) \in \mathbb{R}^K$ ,  $e_a$  is the  $a$ -th standard basis vector, and  $\succ$   
525 means element-wise greater.

526 *Proof.* Denote  $f^* = f^*(x, \cdot) \in \mathbb{R}^K$ . Note that according to the definition of  $G$ , we know that  
527  $(G^\top p)_i$  denotes the probability that action  $i$ 's loss is revealed when the selected action  $a$  is sampled  
528 from distribution  $p$ . Then, we know that

$$\begin{aligned}
 & \overline{\operatorname{dec}}_\gamma(p; \hat{f}, x, G) \\
 &= \sup_{\substack{a^* \in [K] \\ f^* \in \mathbb{R}^K}} \mathbb{E}_{a_t \sim p} \left[ f_{a_t}^* - f_{a^*}^* - \frac{\gamma}{4} \mathbb{E}_{A \sim G(\cdot | a_t)} \left[ \sum_{a \in A} (\hat{f}_a - f_a^*)^2 \right] \right] \\
 &= \sup_{\substack{a^* \in [K] \\ f^* \in \mathbb{R}^K}} (p - e_{a^*})^\top f^* - \frac{\gamma}{4} \sum_{a \in [K]} \|\hat{f} - f^*\|_{\operatorname{diag}(G^\top p)}^2 \\
 &= \sup_{a^* \in [K]} (p - e_{a^*})^\top \hat{f} + \frac{1}{\gamma} \|p - e_{a^*}\|_{\operatorname{diag}(G^\top p)^{-1}}^2 & (G^\top p \succ 0) \\
 &= p^\top \hat{f} + \max_{a^* \in [K]} \left\{ \frac{1}{\gamma} \|p - e_{a^*}\|_{\operatorname{diag}(G^\top p)^{-1}}^2 - e_{a^*}^\top \hat{f} \right\},
 \end{aligned}$$

529 where the third equality is by picking  $f^*$  to be the maximizer and introduces a constraint. Therefore,  
530 the minimization problem  $\min_{p \in \Delta(K)} \overline{\operatorname{dec}}_\gamma(p; \hat{f}, x, G)$  can be written as the following constrained  
531 optimization by variable substitution:

$$\begin{aligned}
 & \min_{p \in \Delta(K), z} \quad p^\top \hat{f} + z \\
 & \text{subject to} \quad \forall a \in [K] : \frac{1}{\gamma} \|p - e_a\|_{\operatorname{diag}(G^\top p)^{-1}}^2 \leq e_a^\top \hat{f} + z, \\
 & \quad \quad \quad G^\top p \succ 0.
 \end{aligned}$$

532 The convexity of the constraints follows from Lemma A.1. □

## 533 B Omitted Details in Section 4

534 In this section, we provide proofs for Section 4. We define  $W_a := \sum_{a' \in N^{\text{in}}(G, a)} p_{a'}$  to be the  
535 probability that the loss of action  $a$  is revealed when selecting an action from distribution  $p$ . Let

536  $\hat{f} = \hat{f}(x, \cdot) \in \mathbb{R}^K$  and  $f = f(x, \cdot) \in \mathbb{R}^K$ . Direct calculation shows that for any  $a^* \in [K]$ ,

$$\begin{aligned} f^* &= \operatorname{argmax}_{f \in \mathbb{R}^K} \mathbb{E}_{a \sim p} \left[ f(x, a) - f(x, a^*) - \frac{\gamma}{4} \cdot \sum_{a' \in N^{\text{in}}(G, a)} (\hat{f}_t(x, a') - f(x, a'))^2 \right] \\ &= \frac{2}{\gamma} \operatorname{diag}(W)^{-1} (p - e_{a^*}) + \hat{f}. \end{aligned}$$

537 Therefore, substituting  $f^*$  into Eq. (4), we obtain that

$$\overline{\text{dec}}_\gamma(p; \hat{f}, x, G) = \max_{a^* \in [K]} \left\{ \frac{1}{\gamma} \left( \sum_{a=1}^K \frac{p_a^2}{W_a} + \frac{1 - 2p_{a^*}}{W_{a^*}} \right) + \langle p - e_{a^*}, \hat{f} \rangle \right\}. \quad (23)$$

538 Without loss of generality, we assume the  $\min_{i \in [K]} \hat{f}_i = 0$ . This is because shifting  $\hat{f}$  by  $\min_{i \in [K]} \hat{f}_i$   
 539 does not change the value of  $\langle p - e_{a^*}, \hat{f} \rangle$ . In the following sections, we provide proofs showing that  
 540 a certain closed-form of  $p$  leads to optimal  $\overline{\text{dec}}_\gamma(p; \hat{f}, x, G)$  up to constant factors for several specific  
 541 types of feedback graphs, respectively.

## 542 B.1 Cops-and-Robbers Graph

543 **Proposition 1.** When  $G = G_{\text{CR}}$ , given any  $\hat{f}$ , context  $x$ , the closed-form distribution  $p$  in Eq. (6)  
 544 guarantees that  $\overline{\text{dec}}_\gamma(p; \hat{f}, x, G_{\text{CR}}) \leq \mathcal{O}\left(\frac{1}{\gamma}\right)$ .

545 *Proof.* We use the following notation for convenience:  $p_1 := p_{a_1}$ ,  $p_2 := p_{a_2}$ ,  $\hat{f}_1 := \hat{f}_{a_1} = 0$ ,  
 546  $\hat{f}_2 := \hat{f}_{a_2}$ . For the cops-and-robbers graph and closed-form solution  $p$  in Eq. (6), Eq. (23) becomes:

$$\overline{\text{dec}}_\gamma(p; \hat{f}, x, G_{\text{CR}}) = \max_{a^* \in [K]} \left\{ \frac{1}{\gamma} \left( \frac{p_1^2}{1 - p_1} + \frac{(1 - p_1)^2}{p_1} + \frac{1 - 2p_{a^*}}{W_{a^*}} \right) + \langle p - e_{a^*}, \hat{f} \rangle \right\}.$$

547 If  $a^* \neq a_1$  and  $a^* \neq a_2$ , we know that

$$\begin{aligned} & \frac{1}{\gamma} \left( \frac{p_1^2}{1 - p_1} + \frac{(1 - p_1)^2}{p_1} + \frac{1 - 2p_{a^*}}{W_{a^*}} \right) + \langle p - e_{a^*}, \hat{f} \rangle \\ &= \frac{1}{\gamma} \left( \frac{p_1^2}{1 - p_1} + \frac{(1 - p_1)^2}{p_1} + 1 \right) + p_1 \hat{f}_1 + p_2 \hat{f}_2 - \hat{f}_{a^*} \\ &\leq \frac{1}{\gamma} \left( \frac{p_1^2}{1 - p_1} + \frac{(1 - p_1)^2}{p_1} + 1 \right) - p_1 \hat{f}_2 \quad (\hat{f}_{a^*} \geq \hat{f}_2 \geq \hat{f}_1 = 0) \\ &\leq \frac{1}{\gamma} \left( \frac{1}{1 - p_1} + 1 + 1 \right) - p_1 \hat{f}_2 \quad (p_1 \in [\frac{1}{2}, 1], p_1 \geq p_2 \in [0, \frac{1}{2}]) \\ &= \frac{1}{\gamma} \left( 4 + \gamma \hat{f}_2 \right) - \left( 1 - \frac{1}{2 + \gamma \hat{f}_2} \right) \hat{f}_2 \\ &\leq \frac{5}{\gamma}. \end{aligned}$$

548 If  $a^* = a_2$ , we can obtain that

$$\begin{aligned} & \frac{1}{\gamma} \left( \frac{p_1^2}{1 - p_1} + \frac{(1 - p_1)^2}{p_1} + \frac{1 - 2p_{a^*}}{W_{a^*}} \right) + \langle p - e_{a^*}, \hat{f} \rangle \\ &= \frac{1}{\gamma} \left( \frac{p_1^2}{1 - p_1} + \frac{(1 - p_1)^2}{p_1} + \frac{1 - 2p_2}{p_1} \right) + p_1 \hat{f}_1 + p_2 \hat{f}_2 - \hat{f}_2 \\ &\leq \frac{1}{\gamma} \left( \frac{p_1^2}{1 - p_1} + \frac{(1 - p_1)^2}{p_1} + \frac{1 - 2(1 - p_1)}{p_1} \right) - p_1 \hat{f}_2 \quad (\hat{f}_1 = 0) \\ &\leq \frac{1}{\gamma} \left( \frac{1}{1 - p_1} + 1 + 2 - \frac{1}{p_1} \right) - p_1 \hat{f}_2 \quad (p_1 \in [\frac{1}{2}, 1], p_2 \in [0, \frac{1}{2}]) \end{aligned}$$

$$\begin{aligned}
&\leq \frac{1}{\gamma} \left( 5 + \gamma \widehat{f}_2 \right) - \left( 1 - \frac{1}{2 + \gamma \widehat{f}_2} \right) \widehat{f}_2 & (p_1 = \frac{1}{2 + \gamma \widehat{f}_2}) \\
&\leq \frac{6}{\gamma}.
\end{aligned}$$

549 If  $a^* = a_1$ , we have

$$\begin{aligned}
&\frac{1}{\gamma} \left( \frac{p_1^2}{1 - p_1} + \frac{(1 - p_1)^2}{p_1} + \frac{1 - 2p_{a^*}}{W_{a^*}} \right) + \langle p - e_{a^*}, \widehat{f} \rangle \\
&\leq \frac{1}{\gamma} \left( \frac{p_1^2}{1 - p_1} + \frac{(1 - p_1)^2}{p_1} + \frac{1 - 2p_1}{1 - p_1} \right) + (1 - p_1) \widehat{f}_2 \\
&\leq \frac{1}{\gamma} \left( 1 - p_1 + \frac{(1 - p_1)^2}{p_1} \right) + (1 - p_1) \widehat{f}_2 \\
&\leq \frac{1}{\gamma} \left( 1 + \frac{1}{2} \right) + \frac{\widehat{f}_2}{2 + \gamma \widehat{f}_2} & (p_1 \in [\frac{1}{2}, 1]) \\
&\leq \frac{3}{\gamma}.
\end{aligned}$$

550 Putting everything together, we prove that  $\overline{\text{dec}}_\gamma(p; \widehat{f}, x, G_{\text{CR}}) \leq \frac{6}{\gamma} \leq \mathcal{O}\left(\frac{1}{\gamma}\right)$ .  $\square$

## 551 B.2 Apple Tasting Graph

552 **Proposition 2.** When  $G = G_{\text{AT}}$ , given any  $\widehat{f}$ , context  $x$ , the closed-form distribution  $p$  in [Eq. \(7\)](#)  
553 guarantees that  $\overline{\text{dec}}_\gamma(p; \widehat{f}, x, G_{\text{AT}}) \leq \mathcal{O}\left(\frac{1}{\gamma}\right)$ .

554 *Proof.* For the apple tasting graph and closed-form solution  $p$  in [Eq. \(7\)](#), [Eq. \(23\)](#) becomes:

$$\overline{\text{dec}}_\gamma(p; \widehat{f}, x, G) = \max_{a^* \in [K]} \left\{ \frac{1}{\gamma} \left( p_1 + \frac{(1 - p_1)^2}{p_1} + \frac{1 - 2p_{a^*}}{W_{a^*}} \right) + \langle p - e_{a^*}, \widehat{f} \rangle \right\}.$$

555 Suppose  $\widehat{f}_1 = 0$ , we know that  $p_1 = 1, p_2 = 0$  and

556 1. If  $a^* = 1$ , we have

$$\frac{1}{\gamma} \left( p_1 + \frac{(1 - p_1)^2}{p_1} + \frac{1 - 2p_{a^*}}{W_{a^*}} \right) + \langle p - e_{a^*}, \widehat{f} \rangle = 0.$$

557 2. If  $a^* = 2$ , direct calculation shows that

$$\frac{1}{\gamma} \left( p_1 + \frac{(1 - p_1)^2}{p_1} + \frac{1 - 2p_{a^*}}{W_{a^*}} \right) + \langle p - e_{a^*}, \widehat{f} \rangle \leq \frac{2}{\gamma}.$$

558 Suppose  $\widehat{f}_2 = 0$ , we know that  $p_1 = \frac{2}{4 + \gamma \widehat{f}_1}, p_2 = 1 - p_1$  and

559 1. If  $a^* = 1$ , we have

$$\begin{aligned}
&\frac{1}{\gamma} \left( p_1 + \frac{(1 - p_1)^2}{p_1} + \frac{1 - 2p_{a^*}}{W_{a^*}} \right) + \langle p - e_{a^*}, \widehat{f} \rangle \\
&= \frac{1}{\gamma} \left( p_1 + \frac{(1 - p_1)^2}{p_1} + \frac{1 - 2p_1}{p_1} \right) - (1 - p_1) \widehat{f}_1 \\
&= \frac{2(1 - p_1)^2}{\gamma p_1} - (1 - p_1) \widehat{f}_1 \\
&= \frac{(2 + \gamma \widehat{f}_1)^2}{\gamma(4 + \gamma \widehat{f}_1)} - (1 - p_1) \widehat{f}_1 \\
&\leq \frac{4 + \gamma \widehat{f}_1}{\gamma} + \frac{2\widehat{f}_1}{4 + \gamma \widehat{f}_1} - \widehat{f}_1 \leq \frac{6}{\gamma}.
\end{aligned}$$

560 2. If  $a^* = 2$ , direct calculation shows that

$$\frac{1}{\gamma} \left( p_1 + \frac{(1-p_1)^2}{p_1} + \frac{1-2p_{a^*}}{W_{a^*}} \right) + \langle p - e_{a^*}, \hat{f} \rangle = \frac{2p_1}{\gamma} + p_1 \hat{f}_1 \leq \frac{1}{\gamma} + \frac{2\hat{f}_1}{4+\gamma\hat{f}_1} \leq \frac{3}{\gamma}.$$

561 Putting everything together, we prove that  $\overline{\text{dec}}_\gamma(p; \hat{f}, x, G_{\text{AT}}) \leq \frac{6}{\gamma} \leq \mathcal{O}\left(\frac{1}{\gamma}\right)$ .  $\square$

### 562 B.3 Inventory Graph

563 **Proposition 3.** When  $G = G_{\text{inv}}$ , given any  $\hat{f}$ , context  $x$ , there exists a closed-form distribution  
 564  $p \in \Delta(K)$  guaranteeing that  $\overline{\text{dec}}_\gamma(p; \hat{f}, x, G_{\text{inv}}) \leq \mathcal{O}\left(\frac{1}{\gamma}\right)$ , where  $p$  is defined as follows:  $p_j =$   
 565  $\max\left\{\frac{1}{1+\gamma(\hat{f}_j - \min_i \hat{f}_i)} - \sum_{j' > j} p_{j'}, 0\right\}$  for all  $j \in [K]$ .

566 *Proof.* Based on the distribution defined above, define  $A \subseteq [K]$  to be the set such that for all  $i \in A$ ,  
 567  $p_i > 0$  and denote  $N = |A|$ . We index each action in  $A$  by  $k_1 < k_2 < \dots < k_N = K$ . According  
 568 to the definition of  $p_i$ , we know that  $p_i$  is strictly positive only when  $\hat{f}_i < \hat{f}_j$  for all  $j > i$  and  
 569 specifically, when  $p_i > 0$ , we know that  $W_i = \sum_{j \geq i} p_j = \frac{1}{1+\gamma\hat{f}_i}$  (recall that  $\min_i \hat{f}_i = 0$  since we  
 570 shift  $\hat{f}$ ). Therefore, define  $W_{k_{N+1}} = 0$  and we know that

$$\begin{aligned} & \overline{\text{dec}}_\gamma(p; \hat{f}, x, G_{\text{inv}}) \\ &= \sum_{i=1}^N p_{k_i} \hat{f}_{k_i} + \frac{1}{\gamma} \sum_{a=1}^K \frac{p_a^2}{W_a} + \max_{a^* \in [K]} \left\{ \frac{1-2p_{a^*}}{\gamma W_{a^*}} - \hat{f}_{a^*} \right\} \\ &\leq \sum_{i=1}^N (W_{k_i} - W_{k_{i+1}}) \hat{f}_{k_i} + \frac{1}{\gamma} + \max_{a^* \in [K]} \left\{ \frac{1-2p_{a^*}}{\gamma W_{a^*}} - \hat{f}_{a^*} \right\} \\ &\leq \frac{2}{\gamma} + \sum_{i=1}^{N-1} \left( \frac{1}{1+\gamma\hat{f}_{k_i}} - \frac{1}{1+\gamma\hat{f}_{k_{i+1}}} \right) \hat{f}_{k_i} + \max_{a^* \in [K]} \left\{ \frac{1-2p_{a^*}}{\gamma W_{a^*}} - \hat{f}_{a^*} \right\} \\ &\leq \frac{3}{\gamma} + \sum_{i=2}^N \frac{\hat{f}_{k_i} - \hat{f}_{k_{i-1}}}{1+\gamma\hat{f}_{k_i}} + \max_{a^* \in [K]} \left\{ \frac{1-2p_{a^*}}{\gamma W_{a^*}} - \hat{f}_{a^*} \right\}. \end{aligned}$$

571 According to Lemma 9 of [Alon et al., 2013] (included as Lemma D.2 for completeness), we know  
 572 that

$$\sum_{i=2}^N \frac{\hat{f}_{k_i} - \hat{f}_{k_{i-1}}}{1+\gamma\hat{f}_{k_i}} = \frac{1}{\gamma} \sum_{i=2}^N \frac{\hat{f}_{k_i} - \hat{f}_{k_{i-1}}}{\frac{1}{\gamma} + \hat{f}_{k_i}} \leq \frac{\text{mas}(G_A)}{\gamma} = \frac{1}{\gamma}, \quad (24)$$

573 where  $G_A$  is the subgraph of  $G$  restricted to node set  $A$  and  $\text{mas}(G)$  is the size of the maximum  
 574 acyclic subgraphs of  $G$ . It is direct to see that any subgraph  $G$  of  $G_{\text{inv}}$  has  $\text{mas}(G) = 1$ .

575 Next, consider the value of  $a^* \in [K]$  that maximizes  $\frac{1-2p_{a^*}}{\gamma W_{a^*}} - \hat{f}_{a^*}$ . If  $a^* \leq k_1$ , then we know that  
 576  $W_{a^*} = 1$  and  $\frac{1-2p_{a^*}}{\gamma W_{a^*}} - \hat{f}_{a^*} \leq \frac{1}{\gamma}$ . Otherwise, suppose that  $k_i < a^* \leq k_{i+1}$  for some  $i \in [N-1]$ .  
 577 According to the definition of  $p$ , if  $a^* \neq k_{i+1}$  we know that  $p_{a^*} = 0$  and

$$\frac{1}{1+\gamma\hat{f}_{a^*}} \leq \sum_{j' > a^*} p_{j'} = W_{k_{i+1}} = W_{a^*}.$$

578 Therefore,

$$\frac{1-2p_{a^*}}{\gamma W_{a^*}} - \hat{f}_{a^*} = \frac{1}{\gamma W_{a^*}} - \hat{f}_{a^*} \leq \frac{1}{\gamma}.$$

579 Otherwise,  $W_{a^*} = W_{k_{i+1}}$  and  $\frac{1-2p_{a^*}}{\gamma W_{a^*}} - \hat{f}_{a^*} \leq \frac{1}{\gamma W_{k_{i+1}}} - \hat{f}_{k_{i+1}} = \frac{1}{\gamma}$ . Combining the two cases  
 580 above and Eq. (24), we obtain that

$$\overline{\text{dec}}_\gamma(p; \hat{f}, x, G_{\text{inv}}) \leq \frac{3}{\gamma} + \frac{1}{\gamma} + \frac{1}{\gamma} = \mathcal{O}\left(\frac{1}{\gamma}\right).$$

581  $\square$

## 582 B.4 Undirected and Self-Aware Graphs

583 **Proposition 4.** *When  $G$  is an undirected self-aware graph, given any  $\hat{f}$ , context  $x$ , there exists a*  
 584 *closed-form distribution  $p \in \Delta(K)$  guaranteeing that  $\overline{\text{dec}}_\gamma(p; \hat{f}, x, G) \leq \mathcal{O}\left(\frac{\alpha}{\gamma}\right)$ .*

585 *Proof.* We first introduce the closed-form of  $p$  and then show that  $\overline{\text{dec}}_\gamma(p; \hat{f}, x, G) \leq \mathcal{O}\left(\frac{\alpha}{\gamma}\right)$ . Specif-  
 586 ically, we first sort  $\hat{f}_a$  in an increasing order and choose a maximal independent set by choosing  
 587 the nodes in a greedy way. Specifically, we pick  $k_1 = \text{argmin}_{i \in [K]} \hat{f}_i$ . Then, we ignore all the  
 588 nodes that are connected to  $k_1$  and select the node  $a$  with the smallest  $\hat{f}_a$  in the remaining node  
 589 set. This forms a maximal independent set  $I \subseteq [K]$ , which has size no more than  $\alpha$  and is also  
 590 a dominating set. Set  $p_a = \frac{1}{\alpha + \gamma \hat{f}_a}$  for  $a \in I \setminus \{k_1\}$  and  $p_{k_1} = 1 - \sum_{a \neq k_1, a \in I} p_a$ . This is a valid  
 591 distribution as we only choose at most  $\alpha$  nodes and  $p_a \leq 1/\alpha$  for all  $a \in I \setminus \{k_1\}$ . Now we show  
 592 that  $\overline{\text{dec}}_\gamma(p; \hat{f}, x, G) \leq \mathcal{O}\left(\frac{\alpha}{\gamma}\right)$ . Specifically, we only need to show that with this choice of  $p$ , for any  
 593  $a^* \in [K]$ ,

$$\sum_{a=1}^K p_a \hat{f}_a - \hat{f}_{a^*} + \frac{1}{\gamma} \sum_{a=1}^K \frac{p_a^2}{W_a} + \frac{1 - 2p_{a^*}}{\gamma W_{a^*}} \leq \mathcal{O}\left(\frac{\alpha}{\gamma}\right).$$

594 Plugging in the form of  $p$ , we know that

$$\begin{aligned} & \sum_{a=1}^K p_a \hat{f}_a - \hat{f}_{a^*} + \frac{1}{\gamma} \sum_{a=1}^K \frac{p_a^2}{W_a} + \frac{1 - 2p_{a^*}}{\gamma W_{a^*}} \\ & \leq \sum_{a \in I \setminus \{k_1\}} \frac{\hat{f}_a}{\alpha + \gamma \hat{f}_a} - \hat{f}_{a^*} + \frac{1 - 2p_{a^*}}{\gamma W_{a^*}} + \frac{1}{\gamma} \quad (p_a \leq W_a \text{ for all } a \in [K]) \\ & \leq \frac{\alpha}{\gamma} - \hat{f}_{a^*} + \frac{1 - 2p_{a^*}}{\gamma W_{a^*}}. \quad (|I| \leq \alpha) \end{aligned}$$

595 If  $a^* = k_1$ , then we can obtain that  $\frac{1 - 2p_{a^*}}{\gamma W_{a^*}} \leq \frac{1}{\gamma W_{k_1}} \leq \frac{\alpha}{\gamma}$  as  $p_{k_1} \geq \frac{1}{\alpha}$  according to the definition of  
 596  $p$ . Otherwise, note that according to the choice of the maximal independent set  $I$ ,  $W_{a^*} \geq \frac{1}{\alpha + \gamma \hat{f}_{a'}}$  for  
 597 some  $a' \in I$  such that  $\hat{f}_{a'} \leq \hat{f}_{a^*}$ . Therefore,

$$-\hat{f}_{a^*} + \frac{1 - 2p_{a^*}}{\gamma W_{a^*}} \leq -\hat{f}_{a^*} + \frac{1}{\gamma W_{a^*}} \leq -\hat{f}_{a^*} + \frac{\alpha + \gamma \hat{f}_{a'}}{\gamma} \leq \frac{\alpha}{\gamma}.$$

598 Combining the two inequalities above together proves the bound.  $\square$

## 599 C Implementation Details in Experiments

### 600 C.1 Implementation Details in Section 5.1

601 We conduct experiments on RCV1 [Lewis et al., 2004], which is a multilabel text-categorization  
 602 dataset. We use a subset of RCV1 containing 50000 samples and  $K = 50$  sub-classes. Therefore,  
 603 the feedback graph in our experiment has  $K = 50$  nodes. We use the bag-of-words vector of each  
 604 sample as the context with dimension  $d = 47236$  and treat the text categories as the arms. In each  
 605 round  $t$ , the learner receives the bag-of-words vector  $x_t$  and makes a prediction  $a_t \in [K]$  as the  
 606 text category. The loss is set to be  $\ell_{t,a_t} = 0$  if the sample belongs to the predicted category  $a_t$  and  
 607  $\ell_{t,a_t} = 1$  otherwise.

608 The function class we consider is the following linear function class:

$$\mathcal{F} = \{f : f(x, a) = \text{Sigmoid}((Mx)_a), M \in \mathbb{R}^{K \times d}\},$$

609 where  $\text{Sigmoid}(u) = \frac{1}{1 + e^{-u}}$  for any  $u \in \mathbb{R}$ . The oracle is implemented by applying online gradient  
 610 descent with learning rate  $\eta$  searched over  $\{0.1, 0.2, 0.5, 1, 2, 4\}$ . As suggested by [Foster and

611 [Krishnamurthy, 2021](#)], we use a time-varying exploration parameter  $\gamma_t = c \cdot \sqrt{\alpha t}$ , where  $t$  is the  
612 index of the iteration,  $c$  is searched over  $\{8, 16, 32, 64, 128\}$ , and  $\alpha$  is the independence number of  
613 the corresponding feedback graph. Our code is built on PyTorch framework [[Paszke et al., 2019](#)]. We  
614 run 5 independent experiments with different random seeds and plot the mean and standard deviation  
615 value of PV loss.

## 616 C.2 Implementation Details in [Section 5.2](#)

### 617 C.2.1 Details for Results on Random Directed Self-aware Graphs

618 We conduct experiments on a subset of RCV1 containing 10000 samples with  $K = 10$  sub-classes.  
619 Our code is built on Vowpal Wabbit [[Langford and Zhang, 2007](#)]. For SqaureCB, the exploration  
620 parameter  $\gamma_t$  at round  $t$  is set to be  $\gamma_t = c \cdot \sqrt{Kt}$ , where  $t$  is the index of the round and  $c$  is the hyper-  
621 parameter searched over set  $\{8, 16, 32, 64, 128\}$ . The remaining details are the same as described in  
622 [Appendix C.1](#).

### 623 C.2.2 Details for Results on Synthetic Inventory Dataset

624 In this subsection, we introduce more details in the synthetic inventory data construction, loss function  
625 constructions, oracle implementation, and computation of the strategy at each round.

626 **Dataset.** In this experiment, we create a synthetic inventory dataset constructed as follows. The  
627 dataset includes  $T$  data points, the  $t$ -th of which is represented as  $(x_t, d_t)$  where  $x_t \in \mathbb{R}^m$  is the  
628 context and  $d_t$  is the realized demand given context  $x_t$ . Specifically, in the experiment, we choose  
629  $m = 100$  and  $x_t$ 's are drawn i.i.d from Gaussian distribution with mean 0 and standard deviation 0.1.  
630 The demand  $d_t$  is defined as

$$d_t = \frac{1}{\sqrt{m}} x_t^\top \theta + \varepsilon_t,$$

631 where  $\theta \in \mathbb{R}^m$  is an arbitrary vector and  $\varepsilon_t$  is a one-dimensional Gaussian random variable with mean  
632 0.3 and standard deviation 0.1. After all the data points  $\{(x_t, d_t)\}_{t=1}^T$  are constructed, we normalize  
633  $d_t$  to  $[0, 1]$  by setting  $d_t \leftarrow \frac{d_t - \min_{t' \in [T]} d_{t'}}{\max_{t' \in [T]} d_{t'} - \min_{t' \in [T]} d_{t'}}$ . In all our experiments, we set  $T = 10000$ .

634 **Loss construction.** Next, we define the loss at round  $t$  when picking the inventory level  $a_t$  with  
635 demand  $d_t$ , which is defined as follows:

$$\ell_{t,a_t} = h \cdot \max\{a_t - d_t, 0\} + b \cdot \max\{d_t - a_t, 0\}, \quad (25)$$

636 where  $h > 0$  is the holding cost per remaining items and  $b > 0$  is the backorder cost per remaining  
637 items. In the experiment, we set  $h = 0.25$  and  $b = 1$ .

638 **Regression oracle.** The function class we use in this experiment is as follows:

$$\mathcal{F} = \{f : f(x, a) = h \cdot \max\{a - (x^\top \theta + \beta), 0\} + b \cdot \max\{x^\top \theta + \beta - a, 0\}, \theta \in \mathbb{R}^m, \beta \in \mathbb{R}\}.$$

639 This ensures the realizability assumption according to the definition of our loss function shown  
640 in [Eq. \(25\)](#). The oracle uses online gradient descent with learning rate  $\eta$  searched over  
641  $\{0.01, 0.05, 0.1, 0.5, 1\}$ .

642 **Calculation of  $p_t$ .** To make SquareCB.G more efficient, instead of solving the convex program  
643 defined in [Eq. \(5\)](#), we use the closed-form of  $p_t$  derived in [Proposition 3](#), which only requires  $\mathcal{O}(K)$   
644 computational cost and has the same theoretical guarantee (up to a constant factor) as the one enjoyed  
645 by the solution solved by [Eq. \(5\)](#). Similar to the case in [Appendix C.1](#), at each round  $t$ , we pick  
646  $\gamma_t = c \cdot \sqrt{t}$  with  $c$  searched over the set  $\{0.25, 0.5, 1, 2, 3, 4\}$ . Note again that the independence  
647 number for inventory graph is 1.

648 We run 8 independent experiments with different random seeds and plot the mean and standard  
649 deviation value of PV loss.

## 650 D Auxiliary Lemmas

651 **Lemma D.1** (Lemma 5 in [Alon et al., 2015]). *Let  $G = (V, E)$  be a directed graph with  $|V| = K$ ,  
 652 in which  $i \in N^{\text{in}}(G, i)$  for all vertices  $i \in [K]$ . Assign each  $i \in V$  with a positive weight  $w_i$  such  
 653 that  $\sum_{i=1}^n w_i \leq 1$  and  $w_i \geq \varepsilon$  for all  $i \in V$  for some constant  $0 < \varepsilon < \frac{1}{2}$ . Then*

$$\sum_{i=1}^K \frac{w_i}{\sum_{j \in N^{\text{in}}(G, i)} w_j} \leq 4\alpha(G) \log \frac{4K}{\alpha(G)\varepsilon},$$

654 where  $\alpha(G)$  is the independence number of  $G$ .

655 **Lemma D.2** (Lemma 9 in [Alon et al., 2013]). *Let  $G = (V, E)$  be a directed graph with vertex set  
 656  $|V| = K$ , in which  $i \in N^{\text{in}}(G, i)$  for all  $i \in [K]$ . Let  $p$  be an arbitrary distribution over  $[K]$ . Then,  
 657 we have*

$$\sum_{i=1}^K \frac{p_i}{\sum_{j \in N^{\text{in}}(G, i)} p_j} \leq \text{mas}(G),$$

658 where  $\text{mas}(G)$  is the size of the maximum acyclic subgraphs of  $G$ .
